1 Prophage induction, but not production of phage particles, is required for lethal disease in a  
2 microbiome-replete murine model of enterohemorrhagic *E. coli* infection

3  
4 Sowmya Balasubramanian<sup>§||</sup>, Marcia S. Osburne<sup>§1</sup>, Haley BrinJones<sup>§#</sup>, Albert K. Tai<sup>¶</sup>, John M.  
5 Leong<sup>§1</sup>

6

7 Author affiliations:

8 <sup>§</sup>Department of Molecular Biology and Microbiology at Tufts University School of Medicine,  
9 Boston, MA 02111 USA

10 <sup>¶</sup> Department of Immunology at Tufts University School of Medicine, Boston, MA 02111 USA

11 <sup>||</sup> Present address: The Forsyth Institute, 245 First St, Cambridge, MA 02142 USA

12 <sup>#</sup> Present address: Department of Cancer Biology, Dana-Farber Cancer Institute, Boston,  
13 MA 02215 USA

14 <sup>1</sup> Grant support: This work was supported by NIH grants R21AI107587 and 2R01AI046454  
15 to JML.

16  
17 <sup>1</sup> Address correspondence to: John Leong: Email: [John.Leong@tufts.edu](mailto:John.Leong@tufts.edu). 136 Harrison Ave,  
18 Boston, MA 02111. Phone: 617-636-0488. FAX: 617-636-0337 or Marcia Osburne: Email  
19 [Marcia.Osburne@tufts.edu](mailto:Marcia.Osburne@tufts.edu). 136 Harrison Ave., Boston, MA 02111. Phone: 617-636-3972.  
20 FAX: 617-636-0337.

21

22

## 23 **Abstract**

24 Enterohemorrhagic *Escherichia coli* (EHEC) colonize intestinal epithelium by generating  
25 characteristic attaching and effacing (AE) lesions. They are lysogenized by prophage that  
26 encode Shiga toxin 2 (Stx2), which is responsible for severe clinical manifestations. As a  
27 lysogen, prophage genes leading to lytic growth and *stx2* expression are repressed, whereas  
28 induction of the bacterial SOS response in response to DNA damage leads to lytic phage  
29 growth and Stx2 production both *in vitro* and in germ-free or streptomycin-treated mice.  
30 Some commensal bacteria diminish prophage induction and concomitant Stx2 production *in*  
31 *vitro*, whereas it has been proposed that phage-susceptible commensals may amplify Stx2  
32 production by facilitating successive cycles of infection *in vivo*. We tested the role of phage  
33 induction in both Stx production and lethal disease in microbiome-replete mice, using our  
34 mouse model encompassing the murine pathogen *Citrobacter rodentium* lysogenized with  
35 the Stx2-encoding phage  $\Phi$ *stx<sub>2dact</sub>*. This strain generates EHEC-like AE lesions on the  
36 murine intestine and causes lethal Stx-mediated disease. We found that lethal mouse  
37 infection did not require that  $\Phi$ *stx<sub>2dact</sub>* infect or lysogenize commensal bacteria. In addition,  
38 we detected circularized phage genomes, potentially in the early stage of replication, in feces  
39 of infected mice, confirming that prophage induction occurs during infection of microbiota-  
40 replete mice. Further, *C. rodentium* ( $\Phi$ *stx<sub>2dact</sub>*) mutants that do not respond to DNA damage  
41 or express *stx* produced neither high levels of Stx2 *in vitro* or lethal infection *in vivo*,  
42 confirming that SOS induction and concomitant expression of phage-encoded *stx* genes are  
43 required for disease. In contrast, *C. rodentium* ( $\Phi$ *stx<sub>2dact</sub>*) mutants incapable of prophage  
44 genome excision or of packaging phage genomes retained the ability to produce Stx *in vitro*,  
45 as well as to cause lethal disease in mice. Thus, in a microbiome-replete EHEC infection

46 model, lytic induction of Stx-encoding prophage is essential for lethal disease, but actual  
47 phage production is not.

#### 48 **Author summary**

49 Enterohemorrhagic *Escherichia coli* (EHEC), a food-borne pathogen that produces Shiga  
50 toxin, is associated with serious disease outbreaks worldwide, including over 390 food  
51 poisoning outbreaks in the U.S. in the last two decades. Humans acquire EHEC by ingesting  
52 contaminated food or water, or through contact with animals or their environment. Infection  
53 and toxin production may result in localized hemorrhagic colitis, but may progress to life-  
54 threatening systemic hemolytic uremic syndrome (HUS), the leading cause of kidney failure  
55 in children. Treatment for EHEC or HUS remains elusive, as antibiotics have been shown to  
56 exacerbate disease.

57 Shiga toxin genes reside on a dormant bacterial virus present in the EHEC genome, but are  
58 expressed when the virus is induced to leave its dormant state and begin to replicate.

59 Extensive virus replication has been thought necessary to produce sufficient toxin to cause  
60 disease.

61 Using viral and bacterial mutants in our EHEC disease mouse model, we showed that  
62 whereas an inducing signal needed to begin viral replication was essential for lethal disease,  
63 virus production was not: sufficient Shiga toxin was produced to cause lethal mouse disease,  
64 even without viral replication. Future analyses of EHEC-infected human samples will  
65 determine whether this same phenomenon applies, potentially directing intervention  
66 strategies.

67

## 68 **Introduction**

69 Shiga toxin-producing *Escherichia coli* (STEC) is a food-borne zoonotic agent associated  
70 with worldwide disease outbreaks that pose a serious public health concern.

71 Enterohemorrhagic *Escherichia coli* (EHEC), a subset of STEC harboring specific virulence  
72 factors that promote a specific mode of colonization of the intestinal epithelium (see below),  
73 is acquired by humans by ingestion of contaminated food or water, or through contact with  
74 animals or their environment. EHEC serotype O157:H7 is a major source of *E. coli* food  
75 poisoning in the United States, accounting for more than 390 outbreaks in the last two  
76 decades[1-5]. EHEC infection usually presents as localized hemorrhagic colitis, and may  
77 progress to the life-threatening systemic hemolytic uremic syndrome (HUS), characterized  
78 by the triad of hemolytic anemia, thrombocytopenia, and renal failure [5, 6]. HUS is the  
79 leading cause of renal failure in children [7].

80 EHEC, along with enteropathogenic *E. coli* and *Citrobacter rodentium* belong to the family of  
81 bacteria known as attaching and effacing (AE) pathogens that are capable of forming  
82 pedestal-like structures beneath bound bacteria by triggering localized actin assembly [8-10].  
83 While this ability of EHEC leads to colonization of the large intestine, production of  
84 prophage-encoded Shiga toxin (Stx) promotes intestinal damage resulting in hemorrhagic  
85 colitis [11-17]. Shiga toxin may further translocate across the colonic epithelium into the  
86 bloodstream, leading to systemic disease. Distal tissue sites, including the kidney, express  
87 high levels of the Shiga toxin-binding globotriosylceramide (Gb3) receptor, potentially leading  
88 to HUS [14, 15, 18-21].

89 Genes encoding EHEC Shiga toxin are typically encoded in the late gene transcription  
90 region of integrated lambdoid prophages [22, 23] and their expression is thus predicted to be

91 temporally controlled by phage regulons [24-27]. Early studies showed that high levels of Stx  
92 production and release from the bacterium *in vitro* required prophage induction, i.e., the  
93 mechanism by which quiescent prophages of lysogenic bacteria are induced to replicate  
94 intracellularly and released as phage particles by host cell lysis [27, 28]. Lambdoid phage  
95 inducers are most commonly agents that damage DNA or interfere with DNA synthesis, such  
96 as ultraviolet light or mitomycin C. These inducing stimuli trigger activation of the bacterial  
97 RecA protein, ultimately leading to the cleavage of the prophage major repressor protein, CI,  
98 allowing expression of phage early and middle genes. Late gene transcription, which  
99 requires the Q antiterminator, results in the expression of many virion structural genes and of  
100 endolytic functions S and R, which lyse the bacterium and release progeny phage [29]. Other  
101 signaling pathways involving quorum sensing or stress response have also been implicated  
102 in lysogenic induction [30, 31].

103 Unfortunately, antibiotics commonly used to treat diarrheal diseases in children and adults  
104 are known to induce the SOS response.. Trimethoprim-sulfamethoxazole and ciprofloxacin  
105 have been shown to enhance Stx production *in vitro* [32-34], and antibiotic treatment of  
106 EHEC-infected individuals is associated with an increased risk of HUS [35]. Hence,  
107 antibiotics are contraindicated for EHEC infection and current treatment is limited to  
108 supportive measures [36].

109 A more detailed understanding of the role of prophage induction and Stx production and  
110 disease has been pursued in animal models of EHEC infection. Although some strains of  
111 conventional mice can be transiently colonized with EHEC, colonization is not robust and  
112 typically diminishes over the course of a week [13, 37], necessitating use of streptomycin-  
113 treated [16] or germ-free mice [38, 39] to investigate disease manifestations that require  
114 efficient, longer term intestinal colonization. In streptomycin-treated mice colonized with

115 EHEC, administration of ciprofloxacin, a known SOS inducer, induces the Stx prophage lytic  
116 cycle, leading to increased Stx production in mouse intestines and to Stx-mediated lethality  
117 [40]. Conversely, an EHEC strain encoding a mutant CI repressor incapable of inactivation  
118 by the SOS response was also incapable of causing disease in germ-free mice [41].

119 A potential limitation of the antibiotic-treated or germ-free mouse infection models is the  
120 disruption or absence, respectively, of microbiota, with concomitant alterations in immune  
121 and physiological function [42]. For example, a laboratory-adapted *E. coli* strain that lacks  
122 the colonization factors of commensal or pathogenic *E. coli* is capable of stably colonizing  
123 streptomycin-treated mice [43], and, when overproducing Stx2, is capable of causing lethal  
124 infection in antibiotic-treated mice [17]. Further, as up to 10% of human gut commensal *E.*  
125 *coli* were found to be susceptible to lysogenic infection by Stx phages *in vitro* [44], and it has  
126 been postulated that commensals may play an amplifying role in EHEC disease by fostering  
127 successive rounds of lytic phage growth [44-47]. Finally, gut microbiota may also directly  
128 influence expression of *stx* genes. For example, whereas a genetic sensor of phage  
129 induction suggests that the luminal environment of the germ-free mouse intestine harbors a  
130 prophage-inducing stimulus [41], several commensal bacteria have been shown to inhibit  
131 prophage induction and/or Stx production *in vitro* [48-50]. Alternatively, colicinogenic bacteria  
132 produce DNase colicins that may trigger the SOS response, increasing Stx production [51].

133

134 Our laboratory previously developed a murine model for EHEC using the murine AE  
135 pathogen *C. rodentium* [52, 53], which efficiently colonizes conventionally raised mice and  
136 allows the study of infection in mice with intact microbiota. The infecting *C. rodentium* is  
137 lysogenized with *E. coli* Stx2-producing phage  $\Phi$ 1720a-02 [52, 54] encoding Stx variant  
138 Stx2<sub>dact</sub>, which is particularly potent in mice [55, 56]. Infection of C57BL/6 mice with *C.*

139 *rodentium* ( $\Phi$ 1720a-02), (herein referred to as *C. rodentium* ( $\Phi$ stx<sub>2dact</sub>)), produces many of  
140 the features of human EHEC infection, including colitis, renal damage, weight loss, and  
141 potential lethality, in an Stx<sub>2dact</sub>-dependent manner [52].

142 We have been interested in phage, bacterial, and host factors that lead to lethal EHEC  
143 infection. In the current study, we found that *C. rodentium* (*stx*<sub>2dact</sub>) strains lacking RecA,  
144 which is required for induction of an SOS response, or phage Q protein, which is required for  
145 efficient transcription of the late phage genes, did not produce high levels of Stx *in vitro* or  
146 cause lethal disease in mice. In contrast, mutants defective in prophage excision, phage  
147 assembly, or phage-induced bacterial lysis retained the ability to both produce Stx upon  
148 prophage induction *in vitro* and to cause lethal disease. Excised phage genomes, potentially  
149 undergoing DNA replication leading to phage production or representing packaged phage,  
150 were detected, albeit at low levels, in fecal samples of mice infected with wild type *C.*  
151 *rodentium* ( $\phi$ Stx), but not in mice infected with excision-defective *C. rodentium* ( $\phi$ Stx). Thus,  
152 in a microbiome-replete EHEC infection model, lytic induction of Stx-encoding prophage, but  
153 not actual production of viable phage particles, is essential for Stx production and lethal  
154 disease.

155

## 156 Results

### 157 Gene Map and Features of $\Phi stx_{2dact}$ prophage

158 Lambdoid phage  $\Phi 1720a-02$  was originally isolated from EC1720a-02, a STEC strain found  
159 in packaged ground beef [54]. To create the novel *C. rodentium*-mediated mouse model of  
160 EHEC infection, *C. rodentium* DBS100 (also known as *C. rodentium* strain ICC 168  
161 (GenBank accession number NC\_013716.1)), was lysogenized with phage  $\Phi 1720a-02$   
162 marked with a chloramphenicol (*cam*)-resistance cassette inserted into the phage *Rz* gene,  
163 creating lysogen DBS770 [52, 53]. A second lysogen, DBS771, encodes the  
164 chloramphenicol-marked prophage with an additional kanamycin (*kan*)-resistance cassette  
165 inserted into the prophage *stx2A* gene. Thus, in contrast to strain DBS770, DBS771 is  
166 unable to produce Shiga toxin or mediate lethal infection in mice. For simplicity, and for  
167 clarity with regard to phage mutations, phage  $\Phi 1720a-02$ , and strains DBS770 and DBS771  
168 will herein be referred to as  $\Phi stx_{2dact}$ , *C. rodentium* ( $\Phi stx_{2dact}$ ), and *C. rodentium*  
169 ( $\Phi \Delta stx_{2dact}::kan^R$ ), respectively (Table 1).

170 **Table 1. Bacterial strains and plasmids.**

| Strain                                            | Description                                                                                    | Reference                                        |
|---------------------------------------------------|------------------------------------------------------------------------------------------------|--------------------------------------------------|
| <i>C. rodentium</i> wild type                     | Strain DBS100 (also known as ICC 168).                                                         | (Barthold et al., 1976; Schauer and Falkow 1993) |
| <i>C. rodentium</i> ( $\Phi stx_{2dact}$ )        | DBS770, i.e., DBS100 ( $\Phi 1720a-02 \Delta Rz::cat$ ), chloramphenicol <sup>R</sup>          | [78] and GenBank accession number KF030445       |
| <i>C. rodentium</i> ( $\Phi stx_{2dact}::kan^R$ ) | DBS771, i.e., DBS770 with a kanamycin resistance cassette inserted into the <i>stx2A</i> gene, | [78]                                             |



|                                                                   |                                                                                                               |                           |
|-------------------------------------------------------------------|---------------------------------------------------------------------------------------------------------------|---------------------------|
|                                                                   | chloramphenicol and kanamycin resistant                                                                       |                           |
| <i>C. rodentium</i> ( $\Phi$ stx <sub>2dact</sub> $\Delta$ int)   | DBS770 deleted for prophage <i>int</i> gene                                                                   | This study                |
| <i>C. rodentium</i> ( $\Phi$ stx <sub>2dact</sub> $\Delta$ SR)    | DBS770 deletion for prophage <i>SR</i> genes                                                                  | This study                |
| <i>C. rodentium</i> ( $\Phi$ stx <sub>2dact</sub> $\Delta$ B)     | DBS770 deleted for prophage <i>B</i> gene                                                                     | This study                |
| <i>C. rodentium</i> ( $\Phi$ stx <sub>2dact</sub> $\Delta$ Q)     | DBS770 with deleted for prophage <i>Q</i> gene                                                                | This study                |
| <i>C. rodentium</i> $\Delta$ recA ( $\Phi$ stx <sub>2dact</sub> ) | DBS770 deleted for host <i>recA</i> gene                                                                      | This study                |
| <i>C. rodentium</i> $\Delta$ rpoS ( $\Phi$ stx <sub>2dact</sub> ) | DBS770 deleted for host <i>rpoS</i> gene                                                                      | This study                |
| <i>C. rodentium</i> $\Delta$ qseC ( $\Phi$ stx <sub>2dact</sub> ) | DBS770 deleted for host <i>qseC</i> gene                                                                      | This study                |
| <i>C. rodentium</i> $\Delta$ qseF ( $\Phi$ stx <sub>2dact</sub> ) | DBS770 deleted for host <i>qseF</i> gene                                                                      | This study                |
| 171                                                               |                                                                                                               |                           |
| <i>E. coli</i> K12 DH5 $\alpha$                                   | <i>fhuA2 lac(del)U169 phoA glnV44 <math>\Phi</math>80' lacZ(del)M15 gyrA96 recA1 relA1 endA1 thi-1 hsdR17</i> | Taylor et al., 1993       |
| <b>Plasmid</b>                                                    | <b>Description</b>                                                                                            | <b>Reference</b>          |
| pKD46                                                             | Phage Lambda- <i>red</i> recombinase, <i>bla</i>                                                              | Datsenko and Wanner, 2000 |
| 172                                                               |                                                                                                               |                           |
| 173                                                               |                                                                                                               |                           |

174 To identify phage genes critical for lethal mouse infection, we sought to inactivate specific  
175 prophage genes and then assess their resulting phenotypes in the *C. rodentium* mouse  
176 model. As a first step, we sequenced the parental strain DBS100 and the genomes of *C.*  
177 *rodentium* ( $\Phi stx_{2dact}$ ) and *C. rodentium* ( $\Phi \Delta stx_{2dact}::kan^R$ ), revealing that the three genomes  
178 were identical except for the prophages present in *C. rodentium* ( $\Phi stx_{2dact}$ ) and *C. rodentium*  
179 ( $\Phi \Delta stx_{2dact}::kan^R$ ) (data not shown). We utilized these sequences to annotate the entire  
180  $\Phi stx_{2dact}$  prophage (GenBank accession number KF030445.1) present in strains *C. rodentium*  
181 ( $\Phi stx_{2dact}$ ) and *C. rodentium* ( $\Phi stx_{2dact}::Kan^R$ ), as diagrammed in Fig. S1. As is typical of Stx  
182 phages, the prophage sequence revealed a lambdoid phage with a mosaic gene  
183 organization, but nevertheless syntenic to varying degrees with other lambdoid phages [65].  
184 Of note, as is the case for another lambdoid phage (*E. coli* phage mEP460, GenBank  
185 accession number JQ182728), the orientation of the  $\Phi stx_{2dact}$  central regulatory region  
186 encoding CI repressor, other regulators such as N, Q and Cro, and the lytic promoters  $P_L$   
187 and  $P_R$ , is inverted with respect to the canonical map of phage lambda [66]. Although strains  
188 *C. rodentium* ( $\Phi stx_{2dact}$ ) and *C. rodentium* ( $\Phi \Delta stx_{2dact}::kan^R$ ) were lysogenized independently,  
189 in both strains the prophage was integrated at the same location, i.e. 100 bp into the coding  
190 sequence of *dusA*, which encodes tRNA-dihydroxyuridine synthase A. A recent study [67]  
191 revealed that known integrase genes, at least half of which belong to prophages, were found  
192 adjacent to the host *dusA* gene in over 200 bacterial species. Furthermore, a 21 base pair  
193 motif found at the prophage-host DNA junctions in many bacteria was present at the  
194 prophage junctions, *attL* and *attR*, of *C. rodentium* ( $\Phi stx_{2dact}$ ) and *C. rodentium* ( $\Phi \Delta$   
195  $stx_{2dact}::kan^R$ ), as well as at the presumed *attB* phage insertion site in the parental *C.*  
196 *rodentium dusA* gene (Fig. 1). A seven-base segment within this 21-base sequence is  
197 completely conserved between *attL*, *attR*, and *attB* and likely represents the ‘core’ sequence

198 within which recombination occurs during integration or excision (Fig. 1, bolded sequence;  
199 [68]). Finally, although the  $\Phi stx_{2dact}$  and  $\Phi \Delta stx_{2dact}::kan^R$  prophages interrupt the *dusA* gene,  
200 they encode a 184 bp ORF (designated " $\Phi dusA$ " in Fig. 1) that is in frame with the 3' 937  
201 nucleotides (positions 101 to 1038) of *dusA* that could serve to foster the production of a  
202 protein containing the C-terminal 312 amino acids of the canonical DusA.  
203 A prior analysis of the host *C. rodentium* DBS100 genome sequence revealed the presence  
204 of 10 additional partial and intact prophages distributed around the genome [69]. Using NCBI  
205 BLAST nucleotide analysis, we found only 2 regions of homology between  $\Phi stx_{2dact}$  and  
206 these prophages: one resident prophage (integrated at *C. rodentium* genome bp 2764517 –  
207 2766051) encoded partial (70%) homology to the  $\Phi stx_{2dact}$  *cl* repressor gene, and another  
208 resident prophage (integrated at *C. rodentium* genome bp 2097787- 2098157) showed 79%  
209 homology to a  $\Phi stx_{2dact}$  gene encoding a hypothetical protein (data not shown). No other  
210 significant homology between  $\Phi stx_{2dact}$  and the resident prophages was detected.

211

212 **Survey of prophage integration (*attP*) sites during murine infection reveals  $\Phi stx_{2dact}$**   
213 **prophage excision from *C. rodentium* ( $\Phi stx_{2dact}$ ), but no secondary lysogeny of**  
214 **commensal bacteria**

215

216 In the course of EHEC infection of streptomycin-treated mice, Stx phage could be induced by  
217 antibiotic treatment to lysogenize other *E coli* strains in the intraluminal environment [40],  
218 (also see [70]). It has been postulated that successive cycles of infection of non-pathogenic  
219 commensal *E. coli* could amplify Stx production and exacerbate disease [38, 44, 45, 47]. We  
220 first addressed this question by testing whether lysogeny of commensal bacteria by phage  
221  $\Phi stx_{2dact}$  was detectable following oral *C. rodentium* ( $\Phi stx_{2dact}$ ) infection of mice. Mice orally

222 gavaged with *C. rodentium* ( $\Phi stx_{2dact}$ ) normally exhibit weight loss and lethal disease ([52],  
223 not shown), typically succumbing to disease after day 7 post-infection. DNA was extracted  
224 from fecal samples of a group of five mice at days 1 and 6 post infection. The DNA samples  
225 were used as a template to generate a library of sequences encompassing the sequence  
226 downstream of *attL* (specifically, spanning the region from the phage *int* gene, through  
227  $\Phi$  *dusA* and into the adjacent host sequence; see Fig. 1). This strategy is a modification of  
228 that used for *Tn*-seq library analysis ([62], Materials and Methods).

229 Although we were unable to obtain detectable amplified DNA from fecal samples produced  
230 on day 1 post-infection, consistent with the low titer of *C. rodentium* ( $\Phi stx_{2dact}$ ) in the stool at  
231 this early time point, the day 6 post-infection sample yielded a DNA library, which was  
232 subjected to massively parallel sequencing to identify the origin of the host DNA into which  
233 the prophage was integrated. Of the total 17,868,095 sequences generated, all but 725,997  
234 (4.06%) were of sufficient quality to analyze (Table 2; see Materials and Methods). Of the  
235 readable sequences, 99.56% showed homology to *C. rodentium* ( $\Phi stx_{2dact}$ ), i.e. included *C.*  
236 *rodentium* ( $\Phi stx_{2dact}$ ) *attL* and the adjacent *C. rodentium* *dusA* gene sequence, indicating  
237 prophage integration into the original *C. rodentium* strain. For the remaining 0.44% of  
238 sequences, the *C. rodentium* *dusA* sequences adjacent to the *attL* core sequence were  
239 found to be replaced by phage-specific sequences of *attR* at the other end of the prophage.  
240 Hence, these 0.44% of sequences encode *attP*, likely regenerated by recombination of *attL*  
241 and *attR* and probably reflecting excised circular phage genomes generated following  
242 induction of the *C. rodentium* ( $\Phi stx_{2dact}$ ) lysogen. Thus, our analysis indicates that *C.*  
243 *rodentium* ( $\Phi stx_{2dact}$ ) undergoes lytic induction in the murine host, consistent with previous  
244 findings of EHEC infection in streptomycin-treated mice. Furthermore, of the more than 17  
245 million sequences analyzed, none showed integration of the  $\Phi stx_{2dact}$  prophage into a

246 different site in *C. rodentium*, or into a different bacterial host. Thus, lysogeny of commensal  
247 bacteria by  $\Phi stx_{2dact}$  is not a common event in this model.

248 **Table 2. Comprehensive survey of prophage attachment (integration) sites reveals**  
249 **prophage excision but not secondary lysogeny of commensal bacteria during murine**  
250 **infection by *C. rodentium* ( $\Phi stx_{2dact}$ )**

251

| Sequence identity                                      | Number     | Percent of total |
|--------------------------------------------------------|------------|------------------|
| <i>C. rodentium</i> ( $\Phi stx_{2dact}$ ) <i>attL</i> | 17,066,136 | 99.56            |
| $\Phi stx_{2dact}$ <i>attP</i> (replicative form)      | 75,962     | 0.44             |
| Total sequences <sup>1</sup>                           | 17,142,098 | 100.00           |

252 <sup>1</sup>Of a total of 17,868,095 sequences, 725,997 were of poor quality, resulting in a total of  
253 17,142,098 readable sequences.

254

255 ***C. rodentium* RecA and  $\Phi stx_{2dact}$  proteins integrase, Q, endolysins, and portal protein**  
256 **are required for efficient phage production and release *in vitro*.**

257 Prophage induction of lambdoid phages is often initiated by DNA damage, in which SOS  
258 pathway activation leads to RecA-promoted autocleavage of  $\text{Cl}$  repressor, followed by  
259 transcription of early genes from the from  $P_L$  and  $P_R$  promoters. Subsequent temporally  
260 programmed transcription of the prophage genome results in the production of delayed early  
261 (middle) proteins such as *Int* (integrase), essential for prophage integration and excision, and  
262 antiterminator protein *Q*. Production of *Q* in turn mediates the transcription of late genes,  
263 including portal protein gene *B*, responsible for translocation of phage DNA into the virion

264 protein capsid, and lysis genes *S* and *R*, encoding endolysins that disrupt the bacterial  
265 plasma membrane causing release of intact phage progeny (for a review, see Gottesman  
266 and Weisberg [66]). Late genes in EHEC phages also encompass *stx*.

267

268 To uncover the roles of specific phage and bacterial functions in EHEC disease, we used  
269 lambda *red* recombination (Materials and Methods) to construct *C. rodentium* ( $\Phi stx_{2dact}$ )  
270 strains defective for prophage genes *SR*, *int*, *B*, or *Q*, and the host gene *recA*, which is well  
271 documented to be central to the SOS response and lytic induction. In addition, we  
272 inactivated three other genes that have been implicated as having more subtle roles in the  
273 lytic induction of Shiga toxin-encoding phage [30, 31]: *rpoS*, which controls the bacterial  
274 stress response, and *qseC* and *qseF*, which control quorum sensing pathways (Materials  
275 and Methods, Table 1). None of the mutants displayed a growth defect upon *in vitro* culture  
276 in rich broth (Fig. S2 and data not shown).

277 We then tested *C. rodentium* ( $\Phi stx_{2dact}$ ) and several of the mutant derivatives predicted to  
278 have dramatic effects on phage production for the ability to generate  $\Phi stx_{2dact}$  following SOS  
279 induction. Pilot experiments revealed that  $\Phi stx_{2dact}$  plaques were not detectable on any of  
280 numerous indicator strains (not shown), so phage production was measured by qPCR [71]  
281 using primers flanking the phage *attP* site (Table 3). As only excised phage have a  
282 reconstituted *attP* site [66], these primers only amplify product from unintegrated phage  
283 genomes.

284

285

286

287

288

289 **Table 3. Primers used in this study.**

290

| <b>Primer</b>                                         | <b>5' → 3'</b>                                                                                            |
|-------------------------------------------------------|-----------------------------------------------------------------------------------------------------------|
| <b>Primers for Mutant Construction and Validation</b> |                                                                                                           |
| <i>Cr</i> ( $\Phi\Delta SR$ ) F                       | ATCGGTGTGTGCCGGTGGTCTTTATATTGTTGTG<br>AGCTTCCGGATTGCCGGGAGACGGGGTGGTCAT<br>GATCAGCACGTGTTGACAATTAATCATCGG |
| <i>Cr</i> ( $\Phi\Delta SR$ ) R                       | CAGCCCATAACAGACAGACGATGATGCAGATAAC<br>CAGAGCGTAAATAATCGCGGTTACTCTTCTCAGT<br>CCTGCTCCTCGGCCACGAAGTGCACGCAG |
| <i>Cr</i> ( $\Phi\Delta SR$ ) validation F            | CAACGAGAAAATCCCATGTCAGAAATTACATCCC<br>TGGTC                                                               |
| <i>Cr</i> ( $\Phi\Delta SR$ ) validation R            | CTCATCAGCTTACTCTCCCCGCGCCGC                                                                               |
| <i>Cr</i> ( $\Phi\Delta int$ ) F                      | CGTTAGGTTCCCGCACAGGTTCCACGTTTTATG<br>GGAACCCGAAATAACGAGGTCGTGTAGGTCATG<br>ATCAGCACGTGTTGACAATTAATCATCGG   |
| <i>Cr</i> ( $\Phi\Delta int$ ) R                      | ATACTGTGTTTGTATACAGTATCATTTTTAACTGTA<br>TGGATAAACAGTGTCTCAGTCCTGCTCCTCGGCCAC<br>GAAGTGCACGCAG             |
| <i>Cr</i> ( $\Phi\Delta int$ ) validation F           | GGGAACCCGAAATAACGAGGTCGTGTA                                                                               |
| <i>Cr</i> ( $\Phi\Delta int$ ) validation R           | CATTTTTAACTGTATGGATAAACAGTG                                                                               |
| <i>Cr</i> ( $\Phi\Delta Q$ ) F                        | AGTAACCACTCTTAACATACTGACATACTTTTTGCGG<br>ACCGCGCTAATCATTTTTGGTCATGATCAGCACGTGTT<br>GACAATTAATCATCGG       |
| <i>Cr</i> ( $\Phi\Delta Q$ ) R                        | CGTTTTATCGATCGCGCGCTGGCGATTGGTGTGCTGT<br>CCTGATTTTTGTGGAGAAAGTTGTCAGTCCTGCTCCTCG<br>GCCACGAAGTGCACGCAG    |
| <i>Cr</i> ( $\Phi\Delta Q$ )500bpextn F               | ACCAGCCGCCCATTTACCAC<br>CCGGAAAGTGCAGCCCGTAAG                                                             |

*Cr* ( $\Phi\Delta Q$ )500bpextn R

*Cr* ( $\Phi\Delta Q$ ) validation F      TGC GG ACC GCG CTAATCATT TTT

*Cr* ( $\Phi\Delta Q$ ) validation R      CCTGATTTTGTGGAGAAAGTTG

  

*Cr* ( $\Phi\Delta B$ ) F                      GCCGCGATGGTGAGCCGCGAGGCCGGGGAAAACCG  
GGATTTAAACTGGCGAGGTTTTAGGTCATGATCAG  
CACGTGTTGACAATTAATCATCGG

*Cr* ( $\Phi\Delta B$ ) R                      TCGTCATAAATATAAATATCCGCGTCACCCGGCCCC  
CCAGCCTGCATCCTGAACCAGGATTCAGTCCTGCT  
CCTCGGCCACGAAGTGCACGCAG

*Cr* ( $\Phi\Delta B$ ) validation F      ACCGGGATTTAAACTGGCGAGGTTTTA

*Cr* ( $\Phi\Delta B$ ) validation R      CCCCCAGCCTGCATCCTGAACCAGGAT

  

*Cr* ( $\Phi$ ) $\Delta recA$  F                    AATTGCTTCAACAGTACAGAATTC ACTATCCGGAT  
AAGCGCAAGCGGAACCCGGCATGACAGGAGTAG  
TTAGGTCATGATCAGCACGTGTTGACAATTAATCA  
TCGG

*Cr* ( $\Phi$ ) $\Delta recA$  R                    ACCCTGAGTTGTA ACTTACCTTCTTGCCGGACGGC  
AGCTTTGCGCCATCCGGCTTGCGGTTACCTGAAAA  
TCAGTCCTGCTCCTCGGCCACGAAGTGCACGCAG

*Cr* ( $\Phi$ ) $\Delta recA$  validation F      ACTGTATGAGCATA CAGTAT

*Cr* ( $\Phi$ ) $\Delta recA$  validation R      GCAAAAGGGCCGCATAAGCG

  

*Cr*( $\Phi$ ) $\Delta qseC$  F                    CTGGGCAGCGATTTTATTCGTACCGTTCACGGCAT  
CGGCTATACCCTTAGCGAGGCATAAAAGGTCATG  
ATCAGCACGTGTTGACAATTAATCATCGG

*Cr*( $\Phi$ ) $\Delta qseC$  validation F      ACGCCGTTGAGGTT CACGTCC

*Cr*( $\Phi$ ) $\Delta qseC$  validation R      GCAAAATGCGTTTGAGGCT

  

$\Delta$ ROD24971 F                      GTGTTCTGTTTTAGTCGCGTAACCGGTTGCTAACC



GTATCATATCTTGCGGTATGTTGCGGAGGGTCATG  
ATCAGCACGTGTTGACAATTAATCATCGG

$\Delta$ ROD24971 R ACACGCCTGACGCGATACACGGTGATGACCACCCC  
GCCGCGCCGGTATCGCCTGACGAAGAGGTATCTC  
AGTCCTGCTCCTCGGCCACGAAGTGCACGCAG

$\Delta$ ROD24971 validation F GGTTTAATAATCGCATCAATC

$\Delta$ ROD24971 validation R CGTAAGCCAGGCGGGAGCTAC

*Cr* ( $\Phi$ ) $\Delta$ *rpoS* F CGCAGCGATAAATCGACGGAGCAGGCTGACACGG  
GCTTGTTTTGTCAAGGGATCACGGGTAGGAGCCAC  
CTTGGTCATGATCAGCACGTGTTGACAATTAATCAT  
CGG

*Cr* ( $\Phi$ ) $\Delta$ *rpoS* R AGCGGGCAATAATGCAGCCAAAGAAAAAGACCAGC  
CTCACAGAGACTGGTCTTTTCTGATGGAACGGTGC  
TCAGTCCTGCTCCTCGGCCACGAAGTGCACGCAG

*Cr* ( $\Phi$ ) $\Delta$ *rpoS* validation F ATAGCGACTATGGGTAGCAC

*Cr* ( $\Phi$ ) $\Delta$ *rpoS* validation R CCCGCCAGATCTGATAAGCG

### PCR and qPCR Primers

AttP F CTTTGGATAGGTTCCCAATAGGC  
AttP R GGGTTCCCATAAAACGTGGG

RecA F CGCTGACGTTACAGGTGATCGC  
RecA R CCATAGAGGATCTGGAACCTCGG

Dus F CCTTCGGGCTAAGCCCGG  
Dus R GCGCCGTCCACGCGAGG

Phage F GTGACCAAGGCGTACCTGGC  
Phage R CCATCACTTTCTGTGTGCCCC

### Primers for Construction of Sequencing Library

PCR Primer 1 TTGCTTTCCCTGTAAGTGATAACACC

PCR Primer 2 GTGACTGGAGTTCAGACGTGTGCTCTTCCGAT  
CTGGGGGGGGGGGGGGGGGG

|              |                                                                         |
|--------------|-------------------------------------------------------------------------|
| PCR Primer 3 | AATGATACGGCGACCACCGAGATCTACACTCTTT<br>TTTACTGGAATTCTCGGTTTAGCATTGCTCCT  |
| PCR Primer 4 | CAAGCAGAAGACGGCATAACGAGATTAAGGCGAGT<br>GACTGGAGTTCAGACGTGTGCTCTTCCGATCT |
| Seq-P        | ATCTACACTCTTTTTTACTGGAATTCTCGGTTTA<br>GCATTGCTCCT                       |

---

291 **Cr=Citrobacter rodentium**

292

293 In supernatants of LB cultures at mid-logarithmic growth phase, designated as t=0h, we  
294 detected  $1.3 \times 10^9$  -  $3.8 \times 10^9$  *attP* copies (phage genomes) per ml (Table 4 legend). The mid-  
295 log cultures of wild type *C. rodentium* ( $\Phi stx_{2dact}$ ) contained only approximately  $10^8$  viable  
296 bacteria per ml, indicating that significant spontaneous prophage induction had occurred  
297 during the 2-4 hours of culture of this strain prior to entering mid-log growth. Four hours of  
298 further culture of *C. rodentium* ( $\Phi stx_{2dact}$ ) (t=4h) resulted in a 3.2-fold increase in the  
299 concentration of  $\Phi stx_{2dact}$  in the supernatant compared to that at t=0h, consistent with  
300 continued spontaneous prophage induction (Table 4, "Relative *attP* production", "- Mito C").  
301 Prophage induction of the wild type lysogen with the SOS inducer mitomycin C led to a 234-  
302 fold increase in relative *attP* production (Table 4, "+ Mito C"), a 73-fold increase above  
303 baseline levels. As predicted [72, 73], the generation of circular phage genomes required  
304 integrase; at all time points tested, *attP* copies were below the level of detection of  $1 \times 10^4$ /ml  
305 in uninduced or mitomycin C-induced cultures of the *C. rodentium* ( $\Phi stx_{2dact} \Delta int$ ) mutant,  
306 which lacks Int recombinase (Table 4).

307

308

309

310 **Table 4. *C. rodentium* RecA and  $\Phi$ stx<sub>2dact</sub> proteins integrase, Q, endolysins, and portal**  
 311 **protein are required for efficient phage production and release *in vitro*.**

| Strain        | Function deleted                              | Relative attP (phage) production |                       |                              |
|---------------|-----------------------------------------------|----------------------------------|-----------------------|------------------------------|
|               |                                               | - Mito C <sup>a</sup>            | + Mito C <sup>b</sup> | +Mito C + DNase <sup>c</sup> |
| WT            | None (WT)                                     | 3.2 (±0.01)                      | 234.6 (±24.4)         | 162.5 (±1.1)                 |
| $\Delta$ int  | Phage integrase                               | Not detected                     | Not detected          | Not determined               |
| $\Delta$ recA | Host RecA                                     | 0.5 (±0.6)*                      | 29.4 (±11.4)*         | Not determined               |
| $\Delta$ Q    | Phage late gene transcription anti-terminator | 0.5 (±0.3)*                      | 6.0 (±0.3)*           | Not determined               |
| $\Delta$ SR   | Phage endolysin                               | 0.6 (±0.2)*                      | 6.3 (±2.0)*           | Not determined               |
| $\Delta$ B    | Phage portal protein                          | 4.1 (±0.08)                      | 208.7 (±17.2)         | 9.2 (±1.3)*                  |

312 <sup>a</sup>Supernatants from mid-log (t=0h) cultures or parallel cultures grown for an additional 4  
 313 hours (t=4h) were analyzed for attP copies by qPCR. Shown are average values of  
 314 t=4h/t=0h (+/- SEM) for each lysogen, derived from the values of three different dilutions of  
 315 each supernatant (see Materials and Methods). For all lysogens except *C. rodentium*  
 316 ( $\Phi$ stx<sub>2dact</sub> $\Delta$ int), absolute numbers of attP molecules at t=0h ranged from 1.3×10<sup>9</sup> to  
 317 3.8×10<sup>9</sup>/ml. For *C. rodentium* ( $\Phi$ stx<sub>2dact</sub> $\Delta$ int), attP copies were below the limit of detection, i.e.,  
 318 <1× 10<sup>4</sup>/ml.

319 <sup>b</sup>Supernatants from mid-log (t=0h) cultures, and parallel cultures subsequently exposed to  
 320 0.25 µg/ml mitomycin C for 4 hours (t=4h) were analyzed for attP copies by qPCR and the  
 321 ratios of the two values determined as above. For *C. rodentium* ( $\Phi$ stx<sub>2dact</sub> $\Delta$ int), attP copies  
 322 were below the limit of detection, i.e., <1× 10<sup>4</sup>/ml.

323 °Supernatants from mid-log (t=0h) cultures or parallel cultures subsequently exposed to 0.25  
324 µg/ml mitomycin C for 4 hours (t=4h) were analyzed for *attP* copies by qPCR after treatment  
325 with DNase to remove unpackaged DNA. The ratios of the two values determined as above.

326 \*indicates statistical significance (p<0.05) compared to identically treated WT, calculated by  
327 one-way Anova.

328

329 Host and phage functions contributed to the amount of phage production in both the absence  
330 and presence of inducer. In the absence of inducer, (Table 4, “- MitoC”) the concentration of  
331 *attP* copies in culture supernatants of *C. rodentium*  $\Delta recA$  ( $\Phi stx_{2dact}$ ), predicted to be  
332 defective for SOS induction, did not increase between t=0h and t=4h, with an average  
333 relative *attP* production of 0.5. Lysogens deficient in the antiterminator Q, required for late  
334 gene transcription, or deficient in the S and R endolysins, which promote the efficient release  
335 of phage from infected bacteria, were also deficient in relative *attP* production in the absence  
336 of inducer (Table 4). Finally, *C. rodentium* ( $\Phi stx_{2dact}\Delta B$ ), predicted to replicate but not  
337 package phage genomes, showed no defect in the production of *attP* copies in the culture  
338 supernatant in the absence of inducer, with relative phage production ratio of 4.1. However,  
339 as described below, DNase sensitivity assays suggested that these *attP* sequences are  
340 likely not packaged into phage particles.

341 The mutants defective in baseline phage production were similarly defective in the titer of  
342 *attP* copies after induction with mitomycin C (Table 4, “+ Mito C”). Induction of *C. rodentium*  
343  $\Delta recA$  ( $\Phi stx_{2dact}$ ) resulted in a relative *attP* production value of only 29, i.e. eight-fold lower

344 than wild type. *C. rodentium* ( $\Phi stx_{2dact}\Delta Q$ ), and *C. rodentium* ( $\Phi stx_{2dact}\Delta SR$ ), each also  
345 demonstrated dramatically diminished *attP* copies in mitomycin C-induced culture  
346 supernatants, with relative *attP* production of approximately 6. Finally, *C. rodentium*  
347 ( $\Phi stx_{2dact}\Delta B$ ), generated wild type levels of phage genome copies, with a 209-fold increase  
348 in relative *attP* production. However, DNase treatment of supernatants diminished this value  
349 more than 23-fold, whereas parallel treatment diminished the relative *attP* production by wild  
350 type *C. rodentium* ( $\Phi stx_{2dact}$ ) less than 1.5-fold (Table 4, "+Mito C + DNase"), consistent with  
351 a defect in packaging of  $\Phi stx_{2dact}$  genomes in the absence of the B portal protein.

352 **Proteins required for the SOS response and/or late gene transcription are essential for**  
353 **Stx2dact production.**

354 To determine which host or phage functions are required for production of Stx2dact *in vitro*,  
355 we measured Stx2dact in culture supernatants by ELISA [53]. To quantitate non-induced  
356 levels of Stx, and to provide ample time for toxin to accumulate, we grew triplicate cultures of  
357 the *C. rodentium* ( $\Phi stx_{2dact}$ ) or the mutant derivatives described above for four hours (t=4h)  
358 beyond mid-log phase (defined as t=0h). Stx2dact was present in the culture supernatants of  
359 wild type *C. rodentium* ( $\Phi stx_{2dact}$ ) at approximately 50 ng/ml/OD<sub>600</sub> unit, consistent with  
360 previous measurements [53]. Prophage excision and phage production were not required for  
361 this basal level of Stx2dact: culture supernatants of *C. rodentium* ( $\Phi stx_{2dact}\Delta int$ ), which did  
362 not harbor detectable phage (Table 4), contained equivalent amounts of toxin (Fig. 2A, " $\Delta$   
363 *int*"). Uninduced culture supernatants of *C. rodentium* ( $\Phi stx_{2dact}\Delta SR$ ) contained levels of  
364 Stx2dact two-fold lower than (and statistically indistinguishable from) wild type, consistent

365 with the moderately (5-fold) lower levels of phage found in cultures of wild type *C. rodentium*  
366 ( $\Phi stx_{2dact}$ ) (Table 4, “- MitoC”). Supernatants of *C. rodentium* ( $\Phi stx_{2dact}\Delta B$ ), which contained  
367 *attP* DNA but relatively few packaged phage (Table 4), also produced levels of Stx2dact  
368 statistically indistinguishable from wild type. Finally, in contrast, *C. rodentium*  $\Delta recA$   
369 ( $\Phi stx_{2dact}$ ), which is unable to mount an SOS response, and *C. rodentium* ( $\Phi stx_{2dact}\Delta Q$ ),  
370 which cannot transcribe phage late genes, including *stx2dactA* and *stx2dactB*, were  
371 defective for basal levels of Stx2dact production (Fig. 2A, “ $\Delta recA$ ”, “ $\Delta Q$ ”).

372 We also assessed Stx production by wild type *C. rodentium* ( $\Phi stx_{2dact}$ ) and mutant  
373 derivatives after 4h of mitomycin C induction. Given that mitomycin C-induced  $\Phi stx_{2dact}$   
374 functions may be involved in the release of toxin from the bacterial host [27], we assessed  
375 toxin in cell pellets and in culture supernatants separately. As previously observed [52],  
376 mitomycin C induction resulted in a more than 100-fold increase of Stx2dact in culture  
377 supernatants (Fig. 2B, “WT”). A nearly equivalent amount of toxin remained associated with  
378 the bacterial cell pellet, suggesting that under these conditions, a significant fraction of  
379 bacteria remained unlysed. Culture supernatants or cell pellets of the *C. rodentium*  $\Delta rpoS$   
380 ( $\Phi stx_{2dact}$ ) mutant predicted to be defective in the bacterial stress response, or the *C.*  
381 *rodentium*  $\Delta qseC$  ( $\Phi stx_{2dact}$ ) mutant defective for quorum sensing, showed wild type levels of  
382 Stx2dact (Fig. S3), as did *C. rodentium*  $\Delta qseF$  ( $\Phi stx_{2dact}$ ) (data not shown), indicating that  
383 neither the bacterial stress response nor the QseC- or QseF-mediated quorum responses

384 were required for toxin production. Culture supernatants of *C. rodentium* ( $\Phi stx_{2dact}\Delta int$ ) and  
385 *C. rodentium* ( $\Phi stx_{2dact}\Delta B$ ), which showed no defect in basal levels of toxin production (Fig.  
386 2A), also contained amounts of cell-associated toxin and supernatant-associated Stx2dact  
387 indistinguishable from wild type (Fig. 2B, " $\Delta int$ " and " $\Delta B$ "), despite the lack of prophage  
388 excision and/or phage production in these mutant strains. The  $\Delta SR$  lysogen, defective for  
389 phage endolytic functions, produced wild type levels of cell-associated Stx2dact at 4 h post-  
390 induction, but supernatant-associated toxin was approximately ten-fold lower than wild type  
391 levels (Fig. 2B, " $\Delta SR$ "). This difference is consistent with a defect in bacterial lysis and  
392 Stx2dact release, but did not reach statistical significance. In addition, by 16 h post-induction  
393 of the  $\Delta SR$  lysogen, Stx2dact was detected in supernatants at levels similar to that of the WT  
394 strain (Fig. 2C), suggesting that any defect in R and S proteins results in a delay rather than  
395 an absolute block in toxin release. Finally, however, deficiency in the RecA or Q proteins  
396 was associated with a near-complete absence of Stx2dact in cell pellets or supernatants  
397 (Fig. 2B, " $\Delta recA$ " and " $\Delta Q$ "), reinforcing the notion that these proteins, which are required for  
398 the SOS response and/or transcription of the *stx2<sub>dact</sub>* ([74] [66]) are essential for Stx2dact  
399 production.

#### 400 ***C. rodentium* ( $\Phi stx_{2dact}$ ) undergoes lytic induction during murine infection.**

401 Stx-encoding prophages undergo lytic induction during EHEC infection of germ-free or  
402 antibiotic-treated mice [40, 41, 70], and our comprehensive survey of prophage integration  
403 sites in fecal microbiota (Table 3) indicated that *C. rodentium* ( $\Phi stx_{2dact}$ ) undergoes some

404 degree of lytic induction during infection of conventional mice. To assess this induction  
405 further, we infected conventionally raised C57BL/6 mice with *C. rodentium* ( $\Phi$ stx<sub>2dact</sub>) by oral  
406 gavage and measured fecal shedding of both the infecting strain, by plating for CFU, and  
407  $\Phi$ stx<sub>2dact</sub>, by quantitating *attP* (non-integrated phage) copies by qPCR. As previously  
408 observed, by day 3 post-infection, *C. rodentium* ( $\Phi$ stx<sub>2dact</sub>) was detected in the stool at 8 x  
409 10<sup>7</sup> per gram, and reached 9 x 10<sup>10</sup> per gram by day 6 post-infection ([64]; Fig. 3, "CFU of  
410 WT"). Further, murine infection by this strain was indeed associated with lytic induction, as  
411 excised phage genomes were detected in stool at all time points (Fig. 3, "Phage from WT").  
412 Interestingly, given the relatively high phage production by *C. rodentium* ( $\Phi$ stx<sub>2dact</sub>) *in vitro*,  
413 the amount of phage detected in stool was quite low. At day 3 post-infection, 5 x 10<sup>6</sup> *attP*  
414 copies were detected per gram of stool, a value 16-fold lower than the concentration of  
415 viable *C. rodentium* ( $\Phi$ stx<sub>2dact</sub>) in stool at that time point. By day 6 post-infection, *attP* copies  
416 had increased to 5 x 10<sup>7</sup> per gram of feces, but were approximately 600-fold lower than the  
417 fecal bacterial counts. *C. rodentium* ( $\Phi$ stx<sub>2dact</sub>) thus undergoes lytic induction and growth in  
418 this murine model, although not to the degree seen *in vitro*.

419 **Lethal disease in mice correlates with the ability to produce Stx2dact but not with the**  
420 **ability to produce phage.**

421 To test the importance of SOS induction and phage functions on disease in our microbiota-  
422 replete model of infection, we infected C57BL/6 mice with *C. rodentium* ( $\Phi$ stx<sub>2dact</sub>) and  
423 mutant derivatives by oral gavage. The wild type and all mutant lysogens colonized mice  
424 similarly (Fig. S4). *C. rodentium*  $\Delta$ *recA* ( $\Phi$ stx<sub>2dact</sub>) and *C. rodentium* ( $\Phi$ stx<sub>2dact</sub> $\Delta$ Q), the two  
425 mutant lysogens that displayed dramatic defects in basal and mitomycin C-induced levels of  
426 Stx2dact *in vitro*, were the only ones incapable of causing sickness or death (Fig. 3, " $\Delta$ *recA*"



427 and "ΔQ"), supporting the hypothesis that induction of an SOS response and the  
428 subsequent expression of phage late genes, including *stx* genes, are required for Shiga toxin  
429 production during infection of a microbiota-replete host.

430 The RpoS-deficient and QseC-deficient *C. rodentium* ( $\Phi stx_{2dact}$ ) mutants that are  
431 compromised in bacterial stress and quorum-sensing responses, respectively, retained the  
432 ability to cause weight loss and lethality with kinetics that were indistinguishable from that of  
433 WT *C. rodentium* ( $\Phi stx_{2dact}$ ) (Fig. S5). Thus, although previous results indicated that some  
434 quorum sensing mutants display diminished virulence during infection by non-Stx-producing  
435 *C. rodentium* [75], our results are consistent with the the ability of these strains to produce  
436 wild type levels of Stx2 after SOS induction (Fig. S3). In addition, the lack of endolysins that  
437 appeared to somewhat delay release of Stx2dact into supernatants by *C. rodentium*  
438 ( $\Phi stx_{2dact}\Delta SR$ ) was not reflected by any delay in the kinetics of weight loss or lethality in  
439 infected mice (Fig. 3, "ΔSR"), consistent with the ability of this strain to produce wild type  
440 levels of Stx2dact upon extended culture *in vitro*.

441 Finally, the production of intact phage is not essential to disease in this model. *C. rodentium*  
442 ( $\Phi stx_{2dact}\Delta B$ ), which is unable to generate intact phage *in vitro*, and *C. rodentium* ( $\Phi stx_{2dact}\Delta$   
443 *int*), which can neither generate excised phage genomes *in vitro* or *in vivo*, both retained full  
444 virulence in this model. We conclude that in this microbiota-replete model of EHEC infection,  
445 disease progression correlates exclusively with the ability to produce Stx2, regardless of the  
446 lysogen's ability to amplify the *stx2* gene by phage excision and genome amplification, or by  
447 the production of phage that are capable of secondary infection of commensal bacteria.

## 448 Discussion

449 Commensal organisms have the potential to suppress or enhance phage induction and Stx  
450 production. Although a role for induction of *stx*-encoding prophages in the production of Stx  
451 and serious disease during animal infection has been well documented in antibiotic-treated  
452 and germ-free mice [40, 41, 70], we used a murine model of EHEC infection that features an  
453 intact microbiome.

454 To investigate phage functions required for *C. rodentium* ( $\Phi stx_{2dact}$ ) to produce Stx and  
455 cause disease in conventional mice, we first characterized prophage genetic structure.  
456  $\Phi stx_{2dact}$  prophage was integrated into the *C. rodentium dusA* gene, an integration site  
457 utilized by prophages in over 200 bacterial species [67]. Although the orientation of the  
458 regulatory and late genes within the  $\Phi stx_{2dact}$  prophage is noncanonical with respect to *attL*  
459 and *attR* (with *int* adjacent to *attL*; Fig. 1), this orientation has been previously observed in at  
460 least one other lambdoid phage. In addition,  $\Phi stx_{2dact}$  genes encoding several key phage  
461 proteins were identified by homology, and their inactivation had the predicted effects on  
462 phage development and production (Table 4; [73]). For example, antiterminator Q and  
463 integrase were required for phage production, as measured by detection of *attP*, and portal  
464 protein B appeared to be required for packaging of phage DNA into DNase-resistant virions.  
465 Stx production *in vitro* by the prophage mutants, as well as by a host *recA* mutant, confirmed  
466 that prophage induction, i.e., the SOS-dependent process required to initiate a temporal  
467 program of phage gene expression that normally leads to phage lytic growth, is essential for  
468 high-level Stx2 production *in vitro*. Mitomycin C treatment of *C. rodentium* ( $\Phi stx_{2dact}$ ) resulted  
469 in a greater than 100-fold increase in Stx2dact in culture supernatants, similar to the  
470 mitomycin C-mediated increase in Shiga toxin production by EHEC ([41]; Fig. 2). Two

471 signaling pathways, mediated by RpoS and QseC, previously demonstrated to influence  
472 SOS induction of EHEC *in vitro*, had no effect on Stx2dact production by *C. rodentium*  
473 ( $\Phi stx_{2dact}$ ). In contrast, and as expected, RecA, required for mounting an SOS response, was  
474 necessary for this enhanced production of Stx2dact (Fig. 2). It was previously shown that  
475 inactivation of the EHEC prophage repressor CI, a key step in the SOS response, is required  
476 for the increase in EHEC Stx production upon mitomycin C induction *in vitro* [41].

477

478 Despite the previous observation that the increase in phage genome copy number plays the  
479 most quantitatively important role in mitomycin C-enhanced Stx1 production by Stx phage H-  
480 19B [27], we found that integrase-deficient *C. rodentium* ( $\Phi stx_{2dact}$ ), which is deficient in  
481 phage excision and replication (Table 4; [72]), produced levels of Stx2dact indistinguishable  
482 from wild type (Fig. 2). Thus, the ability to cause lethal Stx2-mediated disease was not  
483 correlated with the ability to generate infectious phage. Apparently, enhanced expression of  
484 late genes *stx2<sub>dact</sub>A* and *stx2<sub>dact</sub>B* still occurs in the absence of integrase and is sufficient for  
485 wild type levels of Stx2dact production. As expected, antiterminator protein Q, required for  
486 the transcription of late genes including *stx*, was essential for Stx2dact production by *C.*  
487 *rodentium* ( $\Phi stx_{2dact}$ ), consistent with previous findings for the Stx2 phage  $\Phi 361$  [26]. Finally,  
488 the S endolysin of Stx phage H-19B was previously shown to promote the timely release of  
489 toxin after mitomycin C induction [27]; we found that deficiency of the RS endolysins  
490 encoded by  $\Phi stx_{2dact}$  appeared to diminish the release of Stx2dact into culture supernatants  
491 at 4 hours post-induction (Fig. 2B). However, the decrease was not statistically significant,  
492 and RS-deficiency had no discernible effect on toxin release by 16 hours (Fig. 2C).

493

494 Whereas previous work in streptomycin-treated or gnotobiotic murine models has  
495 demonstrated that induction of the lytic developmental program of Stx phage occurs during  
496 infection and is required for disease [40, 41, 70], we document here that prophage induction  
497 occurs and is critical for productive infection of mice with intact microbiota. Our evidence  
498 includes first that *attP* sequences (indicative of excised, uningegrated phage genomes) were  
499 detected in the feces of infected mice, as revealed by deep sequencing (Table 3), or by  
500 qPCR (Fig. 3). Second, the ability of *C. rodentium* ( $\Phi$ *stx*<sub>2*dact*</sub>) mutant derivatives to trigger the  
501 lytic cycle *in vitro* upon induction, with concomitant expression of the late *stx*<sub>2*dact*</sub> genes,  
502 correlated perfectly with the ability to cause lethal disease in mice. *C. rodentium* ( $\Phi$ *stx*<sub>2*dact*</sub>)  
503 derivatives deficient in phage integrase, portal protein B, or host regulators RpoS or QseC  
504 were entirely competent for production of high levels of Stx<sub>2*dact*</sub> (Figs. 2 and S3), and upon  
505 infection of mice, each of these mutants retained the ability to cause weight loss and death,  
506 with kinetics indistinguishable from the wild type lysogen (Figs. 4 and S5). In contrast,  
507 prophage gene Q, critical for late gene transcription, was required for both *in vitro* Stx<sub>2</sub>  
508 production and lethal infection. RecA, essential for the initiation of the SOS response that  
509 leads to prophage induction, was required for lethality after oral inoculation of *C. rodentium*  
510 ( $\Phi$ *stx*<sub>2*dact*</sub>), consistent with the previous finding that RecA was required for lethality following  
511 intravenous EHEC infection of conventional mice [76]. Interestingly, human neutrophils and  
512 hydrogen peroxide are capable of increasing Stx production by EHEC *in vitro*, perhaps by  
513 triggering oxidative damage [77]. Our use of conventional C57BL/6 mice, for which many  
514 mutants are available, may facilitate studies to determine whether a specific inducing  
515 stimulus is responsible for lytic induction of *C. rodentium* ( $\Phi$ *stx*<sub>2*dact*</sub>).

516 We detected more than  $1 \times 10^9$  phage/ml in uninduced mid-log cultures, suggesting that  
517 there is a high level of spontaneous induction under *in vitro* culture conditions. In contrast,

518 despite severe Stx<sub>2dact</sub>-mediated disease manifestations during productive infection by *C.*  
519 *rodentium* ( $\Phi$ Stx<sub>2dact</sub>), the number of *attP* sequences detected in feces was extremely low,  
520 suggesting that the level of prophage induction during infection may also be low. On day 6  
521 post-infection, only 0.44% of all phage genomes detected were excised, compared to  
522 99.66% that were integrated, reflecting intact prophage (Table 3). Depending on the day  
523 post-infection, excised phage detected by qPCR numbered 20- to 1000-fold fewer than  
524 viable *C. rodentium* ( $\Phi$ Stx<sub>2dact</sub>) cells (Fig. 3). Notably, previous work using a genetic reporter  
525 to indicate activation of lytic promoters of EHEC Stx phage 933W showed that the intestinal  
526 environment of a gnotobiotic mouse was strongly inducing [41]. While we cannot rule out the  
527 possibility that the low number of  $\Phi$ Stx<sub>2dact</sub> *attP* sequences detected in feces reflects an  
528 instability of phage particles or some other factor in the intestinal milieu, our findings are  
529 consistent with the possibility that a low rate of  $\Phi$ Stx<sub>2dact</sub> induction may be sufficient to  
530 promote disease in this model, and that the presence or absence of the gut microbiota may  
531 have a consequential effect on disease outcome.

532

533 Consistent with the low level of phage detected in productively-infected mice, we found no  
534 evidence of  $\Phi$ Stx<sub>2dact</sub> lysogeny of commensal bacteria during *C. rodentium* ( $\Phi$ Stx<sub>dact</sub>) murine  
535 infection, suggesting that secondary infection of commensals by this phage is rare and that  
536 successive rounds of lytic infection are not an essential element of Stx production and  
537 disease in this microbiota-replete infection model. Given that the methods to measure phage  
538 particles utilized in this study can be applied to patient samples, future studies will focus on  
539 the extent of lytic induction of Stx phage during human infection, and how it may correlate  
540 with disease outcome.

541

## 542 **Materials and Methods**

543

### 544 **Bacterial strains and plasmids.**

545

546 Strains and plasmids used in this study are listed in Table 1.

547

### 548 **Phage $\Phi stx_{2dact}$ whole genome sequencing, assembly, and integration site**

#### 549 **determination.**

550 Genomic DNA was isolated from 5 ml of strain *C. rodentium* ( $\Phi stx_{2dact}::kan^R$ ) (Table 1) grown  
551 overnight at 37°C in LB broth containing chloramphenicol (12.5 µg/ml) and kanamycin (25  
552 µg/ml). DNA was extracted using a DNeasy kit (Qiagen), according to the manufacturer's  
553 protocol for Gram negative bacteria. A library of this DNA was then constructed for Illumina  
554 sequencing using Illumina TruSeq DNA Sample Preparation Kit per the manufacturer's  
555 instructions. Following sequencing, the bacterial genome was assembled *de novo* into 1500  
556 contigs using assemblers ABySS [57], and Edena [58]. The Bowtie2 program [59] was then  
557 used to map the *stx2* gene against this assembled genome and the contig containing this  
558 gene was identified. When aligned to the *C. rodentium* genome, a 69594-bp contig revealed  
559 a 47,343 bp prophage containing the *stx2* gene and other phage lambda-like gene  
560 sequences inserted into the host *dusA* gene. (Although the *C. rodentium* *dusA* gene is  
561 interrupted by the prophage genome, a potentially functional *dusA* gene is reconstituted at  
562 the *attL* bacterial/phage DNA junction by fusion with a prophage-derived open reading frame  
563 that we term " $\Phi dusA$ '" in Fig. 1.) The prophage sequence was deposited in GenBank as  
564  $\Phi 1720a-02$ , accession number KF030445.1.

565 Integration of the prophage in both *C. rodentium* ( $\Phi stx_{2dact}$ ) and *C. rodentium*  
566 ( $\Phi \Delta stx_{2dact}::kan^R$ ) into the host *dusA* gene was verified by PCR amplification of the *attL* and  
567 *attR* phage-host junctions using primers DusF/PhageR and DusR/PhageF, respectively

568 (Table 2), then DNA sequencing of the amplified junctions. Subsequent whole genome  
569 sequencing of *C. rodentium* ( $\Phi stx_{2dact}$ ) and *C. rodentium* ( $\Phi \Delta stx_{2dact}::kan^R$ ) showed that, with  
570 the exception of the presence of the  $\Phi stx_{2dact}$  sequences, they are identical to *C. rodentium*  
571 ICC 168, also known as strain DBS100 (GenBank accession number NC\_013716.1), and to  
572 each other (data not shown).

### 573 **Phage $\Phi stx_{2dact}$ genome annotation.**

574 The  $\Phi stx_{2dact}$  genome sequence was first annotated using the program RAST  
575 (<http://rast.nmpdr.org/> [60]). The annotation was further refined by analyzing each open  
576 reading frame using the NCBI program MEGABLAST against the GenBank nucleotide  
577 database.

### 578 **Characterization of phage and prophage sequences in murine stool by massively** 579 **parallel sequencing and analysis.**

580 DNA was extracted from fecal samples of 5 infected sick mice at 6 days post-infection,  
581 according to the method of Yang et al. [61]. Twenty mg stool samples were suspended in 5  
582 ml PBS, pH7.2, and centrifuged at  $100 \times g$  for 15 min at  $4^\circ C$ . The supernatant was  
583 centrifuged at  $13,000 \times g$  for 10 min at  $4^\circ C$ , and the resulting pellet was washed 3 times in  
584 1.5 ml acetone, centrifuging at  $13,000 \times g$  for 10 min at  $4^\circ C$  after each wash step. Two  
585 hundred  $\mu l$  of 5% Chelex-100 (Bio-Rad) and 0.2 mg proteinase K were added to the pellet  
586 and the sample was incubated for 30 min at  $56^\circ C$ . After vortexing briefly, the sample was  
587 centrifuged at  $10,000 \times g$  for 5 min and the supernatant containing the DNA was harvested  
588 and stored.



589 To characterize bacteria that harbor the  $\Phi stx_{2dact}$  prophage, we sequenced the bacterial  
590 bacterial-host *attL* prophage junction and adjacent bacterial DNA by following, with slight  
591 modifications (Suppl. Fig. 1), the methodology of Klein et al. [62] for constructing high-  
592 throughput sequencing libraries that contain a repetitive element (in this case, the phage *int*  
593 (integrase) gene). Briefly, genomic DNA was sheared by sonication to a size of 100-600 bp,  
594 followed by addition of ~20 deoxycytidine nucleotides to the 3' ends of all molecules using  
595 Terminal deoxynucleotidyl Transferase (TdT, Fig. S1, step 2). Two rounds of PCR using a  
596 poly-C-specific and phage *int* gene-specific primer pair (PCR primers 1 and 2, Table 2) were  
597 used to amplify *attL* (Fig. S1, step 3) and to add on sequences necessary for high-  
598 throughput sequencing (PCR primers 3 and 4, Table 2, and Fig.S1, step 4)).

599 Amplicons were sequenced using the MiSeq desktop sequencer (Illumina) and primer Seq-P  
600 (Table 2), providing reads of up to 300 bp. As amplicons spanned the region from the phage  
601 *int* gene, through *attL*, and into the adjacent host genome (see Fig. 1B), reads of this length  
602 were required. 17,868,095 sequences encompassing 5 Gb were downloaded to the Galaxy  
603 server (<https://usegalaxy.org/>) and analyzed (Table 3). We first excluded sequences that  
604 clearly reflected *attL* (i.e., contained the 184 bp of  $\Phi dusA'$  followed by *C. rodentium dusA*),  
605 indicating the prophage inserted into the *C. rodentium* genome. Of the remaining 801,959  
606 sequences, 75,962 (0.44% of the total) encoded the intact *attP* site, implying that they were  
607 circular. These latter sequences presumably reflected excised circular phage genomes,  
608 possibly undergoing early theta DNA replication, ultimately leading to phage production. The  
609 remaining 725,997 sequences encoded only strings of A's and/or C's, and were eliminated  
610 from consideration.

#### 611 **Generation of *C. rodentium* ( $\Phi stx_{2dact}$ ) deletion constructs**



612 Deletion mutants of *C. rodentium* ( $\Phi$ stx<sub>2dact</sub>) in the prophage or the host genome were  
613 generated using a modified version of a one-step PCR-based gene inactivation protocol [63,  
614 64]. Briefly, a PCR product of the zeocin-resistance gene and its promoter region flanked by  
615 70-500 bp homology of the region upstream and downstream of the targeted gene was  
616 generated using the primers listed in Table 2. The chromosomal DNA served as template  
617 when the flanking regions were 500 bp in length on either side of the Zeocin cassette. The  
618 PCR product was electroporated into competent *C. rodentium* ( $\Phi$ stx<sub>2dact</sub>) cells containing the  
619 lambda *red* plasmid pKD46 and recombinants were selected on plates containing  
620 chloramphenicol and zeocin (75 µg/ml). Replacement of the gene of interest with the zeocin  
621 resistance cassette was confirmed using specific primers (Table 2). At least two independent  
622 clones, validated using PCR, were obtained and subsequently analyzed.

623

#### 624 **Quantification of Stx2 produced *in vitro***

625 Overnight 37°C cultures of *C. rodentium* ( $\Phi$ stx<sub>2dact</sub>) or deletion derivatives were diluted 1:25  
626 into 10 ml of fresh medium with appropriate antibiotics. Two independently derived clones for  
627 each mutant were tested, with indistinguishable results. The cultures were grown at 37°C  
628 with aeration to an OD<sub>600</sub> of 0.4, and one ml of each culture was set aside (Table 4, “t=0h”)  
629 The remaining culture was split into 2 cultures. These cultures were grown for a further 4  
630 hours (Table 4, “t=4h”) in the absence or presence of 0.25 µg/ml mitomycin C. (We first  
631 measured phage and Stx2 production at various times post-induction and found the 4-hour  
632 time point to be optimal for obtaining maximal phage and Stx2 following mitomycin C  
633 induction). Culture pellets and supernatants were then harvested by centrifugation at 17,800  
634 × g for 5 minutes at room temperature. For *C. rodentium* ( $\Phi$ stx<sub>2dact</sub>) and *C. rodentium*  
635 ( $\Phi$ stx<sub>2dact</sub>ΔSR), a portion of each culture was also collected after ~16 h of incubation

636 (“t=16h”). Supernatants and pellets were quantitated for Stx2 by ELISA, as described  
637 previously [52].

### 638 **Mouse infection studies**

639 Mice were purchased from Jackson Laboratories and maintained in the Tufts University  
640 animal facility. All procedures were performed in compliance with Tufts University IACUC  
641 protocols. Seven to eight-week-old female C57BL/6J mice were gavaged with PBS or  
642  $\sim 5 \times 10^8$  CFU of overnight culture of *C. rodentium* ( $\Phi stx_{2dact}$ ) or deletion derivatives in 100  $\mu$ l  
643 PBS. Inoculum concentrations were confirmed by serial dilution plating. Fecal shedding was  
644 determined by plating dilutions of fecal slurry on either chloramphenicol, to detect wild type *C.*  
645 *rodentium* ( $\Phi stx_{2dact}$ ), or chloramphenicol-zeocin plates, to detect deletion derivatives  
646 marked with a zeomycin resistance gene [52]. Body weights were monitored daily, and mice  
647 were euthanized upon losing >15% of their body weight.

648 DNA from infected mice fecal pellets was isolated using the QIAGEN DNeasy Blood and  
649 Tissue kit with modifications. Fecal pellets were incubated with buffer ATL and proteinase K  
650 overnight at 55°C. Buffer AL was added, and after mixing, pellets were further incubated at  
651 56°C for 1 h. Pellet mixtures were then centrifuged at 8000 rpm for 1 min and the pellets  
652 were discarded. Ethanol was added to the supernatants, which were processed according to  
653 the manufacturer’s protocol. DNA concentrations were determined using a NanoDrop™  
654 spectrophotometer. qPCR was performed as described below.

655

### 656 **Quantification of phage genomes by qPCR**

657 Excised phage genomes in cell supernatants were quantitated by qPCR. Supernatants were  
658 serially diluted 1:10, 1:100 and 1:1000 in distilled water. Separate reactions using two  $\mu$ l of  
659 the various dilutions as a template were carried out in duplicate. qPCR master-mix (Bio-Rad)  
660 was prepared according to the manufacturer's instructions, using the *attP* primer set (Table  
661 2) to detect copies of excised phage DNA. Results were compared to a standard curve,  
662 derived from a known concentration of a template fragments generated from amplifying *C.*  
663 *rodentium* ( $\Phi$ *stx<sub>2dact</sub>*) DNA using *attP* primers. The template was serially diluted, in duplicate,  
664 to detect copy numbers ranging from  $10^{10}$  to  $10^2$ . qPCR reactions were carried out as  
665 follows: 95°C for 3 min, followed by 35 cycles of 95°C for 1 min, 58°C for 30 sec, and 72°C  
666 for 1 min.

#### 667 **Statistical tests**

668 Data were analyzed using GraphPad Prism software. Comparison of multiple groups were  
669 performed using the Kruskal-Wallis test with Dunn's multiple comparison post-test, or 2-way  
670 ANOVA with Bonferroni's post-tests. In all tests, P values below 0.05 were considered  
671 statistically significant. Data represent the mean  $\pm$  SEM in all graphs.

672

#### 673 **Acknowledgements**

674 We are grateful to Sara Roggensack for suggesting the PhageSeq methodology, David  
675 Lazinski for help with preparation of PhageSeq libraries, Martin Marinus for critical review of  
676 the manuscript, and Michael Pereira, Martin Marinus, and members of the Leong Lab for  
677 many useful suggestions.

678

679

680 **References**

- 681 1. Karmali, M.A., V. Gannon, and J.M. Sargeant, *Verocytotoxin-producing Escherichia*  
682 *coli* (VTEC). *Vet Microbiol*, 2010. **140**(3-4): p. 360-70.
- 683 2. Kaper, J.B., J.P. Nataro, and H.L. Mobley, *Pathogenic Escherichia coli*. *Nat Rev*  
684 *Microbiol*, 2004. **2**(2): p. 123-40.
- 685 3. Pennington, H., *Escherichia coli* O157. *Lancet*, 2010. **376**(9750): p. 1428-35.
- 686 4. Sperandio, V. and C.J. Hovde, eds. *Enterohemorrhagic Escherichia coli and Other*  
687 *Shiga Toxin-Producing E. coli*. . 2015, ASM Press: Washington, D.C.
- 688 5. Karmali, M.A., *Host and pathogen determinants of verocytotoxin-producing*  
689 *Escherichia coli-associated hemolytic uremic syndrome*. *Kidney Int Suppl*, 2009(112):  
690 p. S4-7.
- 691 6. Tarr, P.I., C.A. Gordon, and W.L. Chandler, *Shiga-toxin-producing Escherichia coli*  
692 *and haemolytic uraemic syndrome*. *Lancet*, 2005. **365**(9464): p. 1073-86.
- 693 7. Scheiring, J., et al., *Outcome in patients with recurrent hemolytic uremic syndrome*.  
694 *Pediatric Transplantation*, 2005. **9**: p. 48-48.
- 695 8. Brady, M.J., et al., *Enterohaemorrhagic and enteropathogenic Escherichia coli Tir*  
696 *proteins trigger a common Nck-independent actin assembly pathway*. *Cell Microbiol*,  
697 2007. **9**(9): p. 2242-53.
- 698 9. Vingadassalom, D., et al., *Insulin receptor tyrosine kinase substrate links the E. coli*  
699 *O157:H7 actin assembly effectors Tir and EspF(U) during pedestal formation*. *Proc*  
700 *Natl Acad Sci U S A*, 2009. **106**(16): p. 6754-9.
- 701 10. Lai, Y., et al., *Intimate host attachment: enteropathogenic and enterohaemorrhagic*  
702 *Escherichia coli*. *Cell Microbiol*, 2013. **15**(11): p. 1796-808.

- 703 11. Proulx, F., E.G. Seidman, and D. Karpman, *Pathogenesis of Shiga toxin-associated*  
704 *hemolytic uremic syndrome*. *Pediatr Res*, 2001. **50**(2): p. 163-71.
- 705 12. Thorpe, C.M. and D.W. Acheson, *Testing of urinary Escherichia coli isolates for Shiga*  
706 *toxin production*. *Clin Infect Dis*, 2001. **32**(10): p. 1517-8.
- 707 13. Robinson, C.M., et al., *Shiga toxin of enterohemorrhagic Escherichia coli type*  
708 *O157:H7 promotes intestinal colonization*. *Proc Natl Acad Sci U S A*, 2006. **103**(25):  
709 p. 9667-72.
- 710 14. Obrig, T.G., *Escherichia coli Shiga Toxin Mechanisms of Action in Renal Disease*.  
711 *Toxins (Basel)*, 2010. **2**(12): p. 2769-2794.
- 712 15. Melton-Celsa, A., et al., *Pathogenesis of Shiga-toxin producing escherichia coli*. *Curr*  
713 *Top Microbiol Immunol*, 2012. **357**: p. 67-103.
- 714 16. Wadolkowski, E.A., J.A. Burris, and A.D. O'Brien, *Mouse model for colonization and*  
715 *disease caused by enterohemorrhagic Escherichia coli O157:H7*. *Infect Immun*, 1990.  
716 **58**(8): p. 2438-45.
- 717 17. Wadolkowski, E.A., et al., *Acute renal tubular necrosis and death of mice orally*  
718 *infected with Escherichia coli strains that produce Shiga-like toxin type II*. *Infect*  
719 *Immun*, 1990. **58**(12): p. 3959-65.
- 720 18. Keepers, T.R., et al., *A murine model of HUS: Shiga toxin with lipopolysaccharide*  
721 *mimics the renal damage and physiologic response of human disease*. *J Am Soc*  
722 *Nephrol*, 2006. **17**(12): p. 3404-14.
- 723 19. Davis, T.K., N.C. Van De Kar, and P.I. Tarr, *Shiga Toxin/Verocytotoxin-Producing*  
724 *Escherichia coli Infections: Practical Clinical Perspectives*. *Microbiol Spectr*, 2014.  
725 **2**(4): p. EHEC-0025-2014.
- 726 20. Melton-Celsa, A.R. and A.D. O'Brien, *New Therapeutic Developments against Shiga*  
727 *Toxin-Producing Escherichia coli*. *Microbiol Spectr*, 2014. **2**(5).

- 728 21. Freedman, S.B., et al., *Shiga Toxin-Producing Escherichia coli Infection, Antibiotics,*  
729 *and Risk of Developing Hemolytic Uremic Syndrome: A Meta-analysis.* Clin Infect Dis,  
730 2016. **62**(10): p. 1251-1258.
- 731 22. Mizutani, S., N. Nakazono, and Y. Sugino, *The so-called chromosomal verotoxin*  
732 *genes are actually carried by defective prophages.* DNA Res, 1999. **6**(2): p. 141-3.
- 733 23. Tyler, J.S., J. Livny, and D.I. Friedman, *Lambdoid Phages and Shiga Toxin.*, in  
734 *Phages; Their role in Pathogenesis and Biotechnology.* , M.K. Waldor, D.I. Friedman,  
735 and S. Adhya, Editors. 2005, ASM Press: Washington, D.C. p. 131-164.
- 736 24. Neely, M.N. and D.I. Friedman, *Arrangement and functional identification of genes in*  
737 *the regulatory region of lambdoid phage H-19B, a carrier of a Shiga-like toxin.* Gene,  
738 1998. **223**(1-2): p. 105-13.
- 739 25. Neely, M.N. and D.I. Friedman, *Functional and genetic analysis of regulatory regions*  
740 *of coliphage H-19B: location of shiga-like toxin and lysis genes suggest a role for*  
741 *phage functions in toxin release.* Mol Microbiol, 1998. **28**(6): p. 1255-67.
- 742 26. Wagner, P.L., et al., *Role for a phage promoter in Shiga toxin 2 expression from a*  
743 *pathogenic Escherichia coli strain.* J Bacteriol, 2001. **183**(6): p. 2081-5.
- 744 27. Wagner, P.L., et al., *Bacteriophage control of Shiga toxin 1 production and release by*  
745 *Escherichia coli.* Mol Microbiol, 2002. **44**(4): p. 957-70.
- 746 28. Tyler, J.S., M.J. Mills, and D.I. Friedman, *The operator and early promoter region of*  
747 *the Shiga toxin type 2-encoding bacteriophage 933W and control of toxin expression.*  
748 J Bacteriol, 2004. **186**(22): p. 7670-9.
- 749 29. Casjens, S.R. and R.W. Hendrix, *Bacteriophage lambda: Early pioneer and still*  
750 *relevant.* Virology, 2015. **479-480**: p. 310-30.
- 751 30. Hughes, D.T., et al., *The QseC adrenergic signaling cascade in Enterohemorrhagic E.*  
752 *coli (EHEC).* PLoS Pathog, 2009. **5**(8): p. e1000553.

- 753 31. Imamovic, L., et al., *Heterogeneity in phage induction enables the survival of the*  
754 *lysogenic population*. Environ Microbiol, 2016. **18**(3): p. 957-69.
- 755 32. Karch, H., N.A. Strockbine, and A.D. O'Brien, *Growth of Escherichia coli in the*  
756 *presence of trimethoprim-sulfamethoxazole facilitates detection of Shiga-like toxin*  
757 *producing strains by colony blot assay* FEMS Microbiol Lett, 1986. **35**(2-3): p. 141-  
758 145.
- 759 33. Walterspiel, J.N., et al., *Effect of subinhibitory concentrations of antibiotics on*  
760 *extracellular Shiga-like toxin I*. Infection, 1992. **20**(1): p. 25-9.
- 761 34. Matsushiro, A., et al., *Induction of prophages of enterohemorrhagic Escherichia coli*  
762 *O157:H7 with norfloxacin*. J Bacteriol, 1999. **181**(7): p. 2257-60.
- 763 35. Wong, C.S., et al., *The Risk of the Hemolytic–Uremic Syndrome after Antibiotic*  
764 *Treatment of Escherichia coli O157:H7 Infections*. The New England Journal of  
765 Medicine, 2000. **342**: p. 1930-1936.
- 766 36. Dundas, S., et al., *Using antibiotics in suspected haemolytic-uraemic syndrome:*  
767 *antibiotics should not be used in Escherichia coli O157:H7 infection*. BMJ, 2005.  
768 **330**(7501): p. 1209; author reply 1209.
- 769 37. Mohawk, K.L., et al., *Pathogenesis of Escherichia coli O157:H7 strain 86-24 following*  
770 *oral infection of BALB/c mice with an intact commensal flora*. Microb Pathog, 2010.  
771 **48**(3-4): p. 131-42.
- 772 38. Goswami, K., et al., *Coculture of Escherichia coli O157:H7 with a Nonpathogenic E.*  
773 *coli Strain Increases Toxin Production and Virulence in a Germfree Mouse Model*.  
774 Infect Immun, 2015. **83**(11): p. 4185-93.
- 775 39. Taguchi, H., et al., *Experimental infection of germ-free mice with hyper-toxigenic*  
776 *enterohaemorrhagic Escherichia coli O157:H7, strain 6*. J Med Microbiol, 2002. **51**(4):  
777 p. 336-43.



- 778 40. Zhang, X., et al., *Quinolone antibiotics induce Shiga toxin-encoding bacteriophages,*  
779 *toxin production, and death in mice.* J Infect Dis, 2000. **181**(2): p. 664-70.
- 780 41. Tyler, J.S., et al., *Prophage induction is enhanced and required for renal disease and*  
781 *lethality in an EHEC mouse model.* PLoS Pathog, 2013. **9**(3): p. e1003236.
- 782 42. Fiebiger, U., S. Bereswill, and M.M. Heimesaat, *Dissecting the Interplay Between*  
783 *Intestinal Microbiota and Host Immunity in Health and Disease: Lessons Learned from*  
784 *Germfree and Gnotobiotic Animal Models.* Eur J Microbiol Immunol (Bp), 2016. **6**(4):  
785 p. 253-271.
- 786 43. Myhal, M.L., D.C. Laux, and P.S. Cohen, *Relative colonizing abilities of human fecal*  
787 *and K 12 strains of Escherichia coli in the large intestines of streptomycin-treated*  
788 *mice.* Eur J Clin Microbiol, 1982. **1**(3): p. 186-92.
- 789 44. Gamage, S.D., et al., *Commensal bacteria influence Escherichia coli O157:H7*  
790 *persistence and Shiga toxin production in the mouse intestine.* Infect Immun, 2006.  
791 **74**(3): p. 1977-83.
- 792 45. Gamage, S.D., et al., *Nonpathogenic Escherichia coli can contribute to the production*  
793 *of Shiga toxin.* Infect Immun, 2003. **71**(6): p. 3107-15.
- 794 46. Gamage, S.D., et al., *Diversity and host range of Shiga toxin-encoding phage.* Infect  
795 Immun, 2004. **72**(12): p. 7131-9.
- 796 47. Iversen, H., et al., *Commensal E. coli Stx2 lysogens produce high levels of phages*  
797 *after spontaneous prophage induction.* Front Cell Infect Microbiol, 2015. **5**: p. 5.
- 798 48. de Sablet, T., et al., *Human microbiota-secreted factors inhibit shiga toxin synthesis*  
799 *by enterohemorrhagic Escherichia coli O157:H7.* Infect Immun, 2009. **77**(2): p. 783-  
800 90.



- 801 49. Asahara, T., et al., *Probiotic bifidobacteria protect mice from lethal infection with*  
802 *Shiga toxin-producing Escherichia coli O157:H7*. Infect Immun, 2004. **72**(4): p. 2240-  
803 7.
- 804 50. Carey, C.M., et al., *The effect of probiotics and organic acids on Shiga-toxin 2 gene*  
805 *expression in enterohemorrhagic Escherichia coli O157:H7*. J Microbiol Methods,  
806 2008. **73**(2): p. 125-32.
- 807 51. Toshima, H., et al., *Enhancement of Shiga toxin production in enterohemorrhagic*  
808 *Escherichia coli serotype O157:H7 by DNase colicins*. Appl Environ Microbiol, 2007.  
809 **73**(23): p. 7582-8.
- 810 52. Mallick, E.M., et al., *A novel murine infection model for Shiga toxin-producing*  
811 *Escherichia coli*. J Clin Invest, 2012. **122**(11): p. 4012-24.
- 812 53. Mallick, E.M., et al., *The ability of an attaching and effacing pathogen to trigger*  
813 *localized actin assembly contributes to virulence by promoting mucosal attachment*.  
814 Cell Microbiol, 2014. **16**(9): p. 1405-24.
- 815 54. Gobius, K.S., G.M. Higgs, and P.M. Desmarchelier, *Presence of activatable Shiga*  
816 *toxin genotype (stx(2d)) in Shiga toxigenic Escherichia coli from livestock sources*. J  
817 Clin Microbiol, 2003. **41**(8): p. 3777-83.
- 818 55. Melton-Celsa, A.R., S.C. Darnell, and A.D. O'Brien, *Activation of Shiga-like toxins by*  
819 *mouse and human intestinal mucus correlates with virulence of enterohemorrhagic*  
820 *Escherichia coli O91:H21 isolates in orally infected, streptomycin-treated mice*. Infect  
821 Immun, 1996. **64**(5): p. 1569-76.
- 822 56. Teel, L.D., et al., *One of two copies of the gene for the activatable shiga toxin type 2d*  
823 *in Escherichia coli O91:H21 strain B2F1 is associated with an inducible*  
824 *bacteriophage*. Infect Immun, 2002. **70**(8): p. 4282-91.

- 825 57. Simpson, J.T., et al., *ABYSS: A parallel assembler for short read sequence data*.  
826 Genome Research, 2009. **19**(6): p. 1117-1123.
- 827 58. Hernandez, D., et al., *De novo bacterial genome sequencing: Millions of very short*  
828 *reads assembled on a desktop computer*. Genome Research, 2008. **18**(5): p. 802-  
829 809.
- 830 59. Langmead, B. and S.L. Salzberg, *Fast gapped-read alignment with Bowtie 2*. Nat  
831 Methods, 2012. **9**(4): p. 357-9.
- 832 60. Aziz, R.K., et al., *The RAST Server: Rapid Annotations using Subsystems*  
833 *Technology*. BMC Genomics 2008. **9**: p. 75.
- 834 61. Yang, J.-L., et al., *A simple and rapid method for extracting bacterial DNA from*  
835 *intestinal microflora for ERIC-PCR detection*. World J. Gastroenterol. , 2008. **14**: p.  
836 2872-2876.
- 837 62. Klein, B.A., et al., *Identification of essential genes of the periodontal pathogen*  
838 *Porphyromonas gingivalis*. BMC Genomics, 2012. **13**: p. 578.
- 839 63. Datsenko, K.A. and B.L. Wanner, *One-step inactivation of chromosomal genes in*  
840 *Escherichia coli K-12 using PCR products*. Proc Natl Acad Sci U S A, 2000. **97**(12): p.  
841 6640-5.
- 842 64. Mallick, E.M., et al., *Allele- and tir-independent functions of intimin in diverse animal*  
843 *infection models*. Front Microbiol, 2012. **3**: p. 11.
- 844 65. Smith, D.L., et al., *Comparative genomics of Shiga toxin encoding bacteriophages*.  
845 BMC Genomics, 2012. **13**: p. 311.
- 846 66. Gottesman, M.E. and R.A. Weisberg, *Little lambda, who made thee?* Microbiol Mol  
847 Biol Rev, 2004. **68**(4): p. 796-813.

- 848 67. Farrugia, D.N., et al., *A novel family of integrases associated with prophages and*  
849 *genomic islands integrated within the tRNA-dihydrouridine synthase A (dusA) gene.*  
850 *Nucleic Acids Res*, 2015. **43**(9): p. 4547-57.
- 851 68. Nash, H.A., *Integration and excision of bacteriophage lambda: the mechanism of*  
852 *conservation site specific recombination.* *Annu Rev Genet*, 1981. **15**: p. 143-67.
- 853 69. Petty, N.K., et al., *The Citrobacter rodentium genome sequence reveals convergent*  
854 *evolution with human pathogenic Escherichia coli.* *J Bacteriol*, 2010. **192**(2): p. 525-  
855 38.
- 856 70. Acheson, D.W., et al., *In vivo transduction with shiga toxin 1-encoding phage.* *Infect*  
857 *Immun*, 1998. **66**(9): p. 4496-8.
- 858 71. Anderson, B., et al., *Enumeration of bacteriophage particles: Comparative analysis of*  
859 *the traditional plaque assay and real-time QPCR- and nanosight-based assays.*  
860 *Bacteriophage*, 2011. **1**(2): p. 86-93.
- 861 72. Stevens, W.F., S. Adhya, and W. Szybalski, *Origin and bidirectional orientation of*  
862 *DNA Replication in coliphage lambda.*, in *The Bacteriophage Lambda.*, A.D. Hershey,  
863 Editor. 1971, Cold Spring Harbor Laboratory: Cold Spring Harbor, NY. p. 515-533.
- 864 73. Gottesman, M.E. and M.B. Yarmolinsky, *Integration-Negative Mutants of*  
865 *Bacteriophage Lambda.* *Journal of Molecular Biology*, 1968. **31**(3): p. 487-+.
- 866 74. Dove, W.F., *Action of the lambda chromosome. I. Control of functions late in*  
867 *bacteriophage development.* *J Mol Biol*, 1966. **19**(1): p. 187-201.
- 868 75. Moreira, C.G., et al., *Bacterial Adrenergic Sensors Regulate Virulence of Enteric*  
869 *Pathogens in the Gut.* *MBio*, 2016. **7**(3).
- 870 76. Fuchs, S., et al., *Influence of RecA on in vivo virulence and Shiga toxin 2 production*  
871 *in Escherichia coli pathogens.* *Microb Pathog*, 1999. **27**(1): p. 13-23.

- 872 77. Wagner, P.L., D.W. Acheson, and M.K. Waldor, *Human neutrophils and their products*  
873 *induce Shiga toxin production by enterohemorrhagic Escherichia coli*. Infect Immun,  
874 2001. **69**(3): p. 1934-7.
- 875 78. Mallick, E.M., et al., *A novel murine infection model for Shiga toxin-producing*  
876 *Escherichia coli*. The Journal of clinical investigation, 2012.
- 877
- 878
- 879

880

## 881 **Figure Legends**

882

883 **Fig 1. Prophage  $\Phi stx_{2dact}$  in *C. rodentium* ( $\Phi stx_{2dact}$ ).** The  $\Phi stx_{2dact}$  prophage (gray),  
884 flanked by *attL* and *attR* upon insertion into *C. rodentium dusA* sequence (blue, "*Cr dusA*"),  
885 was determined by whole genome sequencing of *C. rodentium* ( $\Phi\Delta stx_{2dact}::kan^R$ ). The 3' end  
886 of the prophage (nucleotides 1-184) encodes the N-terminal 61 residues of " $\phi dusA$ ," in the  
887 same reading frame as the 3' end (nucleotides 101-1038) of the *C. rodentium dusA* gene  
888 ("*Cr dusA*"). Bent arrows indicate direction of transcription of Q, *stx*, and phage late genes.  
889 Depicted are *attL* and *attR* sequence motifs, characteristic of other prophages inserted within  
890 the host *dusA* gene ([67]). Within this sequence, a bolded seven-base "core" sequence,  
891 perfectly conserved in *attL* and *attR*, as well as in the  $\Phi stx_{2dact}$  *attP* sequence and the  
892 parental *attB* sequence in *C. rodentium dusA* (not shown), is the cross-over site for phage  
893 integration and excision.

894

895 **Fig 2. SOS responsiveness and lytic induction-dependent transcription of *stx* genes**  
896 **are required for wild type basal and induced levels of Stx2 production *in vitro*.** **A.** The  
897 indicated lysogens were grown in the absence of mitomycin C until t=4h, i.e., four hours after  
898 attaining approximately mid-log phase (which was designated as t=0h; "- Mito C"), and  
899 culture supernatants were subjected to capture ELISA to determine the basal level of Stx2  
900 production (see Materials and Methods). Quantities are expressed relative to the specific  
901 OD<sub>600</sub> at t=0h. **B.** The indicated lysogens were grown to mid-log phase (t=0h) and cultured  
902 for four more hours (t=4h) either in the absence ("- Mito C") or presence of 0.25  $\mu$ g/ml  
903 mitomycin C ("+ Mito C"). Pellets (filled bars) or supernatants (open bars) were subjected to  
904 capture ELISA to determine the level of Stx2 production. Quantities are expressed relative to

905 the specific OD<sub>600</sub> at t=0h. **C.** Wild type *C. rodentium* ( $\Phi$ stx<sub>2dact</sub>) and *C. rodentium* ( $\Phi$ stx<sub>2dact</sub>  
906  $\Delta$ RS)) were grown to mid-log phase (designated as t=0h) and cultured for 16 more hours  
907 (t=16h) either in the absence (“- Mito C”) or presence of 0.25  $\mu$ g/ml mitomycin C (“+ Mito  
908 C”). Pellets (filled bars) or supernatants (open bars) were subjected to capture ELISA to  
909 determine the level of Stx2 production. Quantities are expressed relative to the specific  
910 OD<sub>600</sub> at t=0h. For all panels, results are averages  $\pm$  SEM of triplicate samples, and are a  
911 representative of at least two experiments involving independently derived mutants.  
912 Asterisks (\*) indicate Stx level significantly ( $p < 0.05$ ) different from wild type *C. rodentium*  
913 ( $\Phi$ stx<sub>2dact</sub>) calculated using Kruskal–Wallis one-way analysis of variance followed by  
914 Dunn's nonparametric comparison.

915 **Fig 3. *C. rodentium* ( $\Phi$ stx<sub>2dact</sub>) undergoes lytic induction during murine infection.** Eight-  
916 week old female C57BL/6 mice were infected by oral gavage with *C. rodentium* ( $\Phi$ stx<sub>2dact</sub>) or  
917 *C. rodentium* ( $\Phi$ stx<sub>2dact</sub>  $\Delta$ int). At the indicated time points, *attP* copies, reflecting excised  
918 prophages, and viable bacteria were determined by qPCR or plating for CFU, respectively  
919 (see Materials and Methods). Shown are averages  $\pm$  SEM of 5 mice per group of a  
920 representative of two experiments. Level of detection of *attP* was  $1 \times 10^4$  copies/g feces.  
921 Asterisks (\*\*) indicate significance differences ( $p < 0.01$ ) between the WT and *C. rodentium*  
922 ( $\Phi$ stx<sub>2dact</sub>  $\Delta$ int) calculated using 2-way ANOVA followed by Bonferroni post tests.

923 **Fig 4. Lethal disease in mice correlates with the ability to produce Stx2dact but not**  
924 **with the ability to produce phage.** Eight-week old female C57BL/6 mice were infected by  
925 oral gavage with the indicated lysogens. **A.** Percentage weight change was determined at  
926 indicated post-infection time. Data shown are averages  $\pm$  SEM of 10 mice per group.  
927 Asterisks (\*, \*\*) indicate significance ( $p < 0.05$ ,  $< 0.01$ ) determined by 2-way ANOVA followed  
928 by Bonferroni post tests. **B.** Percent survival at the indicated post-infection time was

929 monitored in 10 mice per group. Data represent cumulative results of 3 separate  
930 experiments.

### 931 **Supporting Information**

932 **Fig S1. *C. rodentium* ( $\Phi stx_{2dact}$ ) prophage annotation.** The 47,239 bp prophage DNA  
933 sequence (gray), flanked by *attL* and *attR* upon insertion into *C. rodentium dusA* sequence  
934 (blue, “*Cr dusA*”), was determined by whole genome shotgun sequencing of *C. rodentium*  
935 ( $\Phi stx_{2dact}::kan^R$ ) and annotated, as described in Materials and Methods. Names of encoded  
936 proteins are shown. Unannotated ORFs indicate hypothetical proteins. At the far left end is a  
937 phage sequence that encodes the N-terminal 112 amino acid of an open reading frame  
938 (“ $\Phi dusA$ ”) in the same reading frame as the 3’ end of the *C. rodentium dusA* gene. Strain *C.*  
939 *rodentium* ( $\Phi stx_{2dact}$ ) encodes a chloramphenicol acetyl transferase protein (“*cat*”) inserted into  
940 the prophage *Rz* gene. The sequence of *C. rodentium* ( $\Phi stx_{2dact}::kan^R$ ) is identical to *C.*  
941 *rodentium* ( $\Phi stx_{2dact}$ ) except that gene encoding the A subunit of Stx2dact (“Stx2A”) contains  
942 an 894 bp insertion encoding kanamycin resistance (“*kan*”), plus an additional 27 bp  
943 upstream and 28 bp downstream. Prophage genes studied in this work are shown in bold.  
944 *Cr. C. rodentium.*

945

946 **Fig S2. *C. rodentium* ( $\Phi stx_{2dact}$ ) mutants display no growth defects in rich medium.** The  
947 indicated wild type or mutant *C. rodentium* ( $\Phi stx_{2dact}$ ) were grown in LB broth without  
948 antibiotics. Growth was measured over time by optical density (OD<sub>600</sub>), and growth curves are  
949 the average of duplicate samples. Doubling times were calculated based on the exponential  
950 growth regions of each curve. Representative results from one of two experiments are  
951 shown.

952 **Fig S3. QseC and RpoS are not required for wild type basal and induced levels of Stx2**  
953 **production *in vitro*.** The indicated lysogens were grown to mid-log phase (designated as  
954 t=0h) and cultured for four more hours (t=4h) either in the absence (“-“) or presence (“+“) of  
955 0.25  $\mu$ g/ml mitomycin C. Pellets (filled bars) or supernatants (open bars) were subjected to  
956 capture ELISA to determine the level of Stx2 production. Quantities are expressed relative to  
957 the specific OD<sub>600</sub> at t=0h. Results are averages  $\pm$  SEM of triplicate samples, and are a  
958 representative of at least two experiments. Stx levels of neither the *C. rodentium* ( $\Phi$ stx<sub>2dact</sub>  
959  $\Delta$ qseC) or *C. rodentium* ( $\Phi$ stx<sub>2dact</sub>  $\Delta$ rpoS) strains were significantly different from wild type *C.*  
960 *rodentium* ( $\Phi$ stx<sub>2dact</sub>), calculated using Kruskal–Wallis one-way analysis of variance followed  
961 by Dunn's multiple comparisons test.

962 **Fig S4. *C. rodentium* ( $\Phi$ stx<sub>2dact</sub>) mutants do not display colonization defects.** Eight-week  
963 old female C57BL/6 mice were infected by oral gavage with the indicated lysogens. Fecal  
964 shedding of the lysogens was determined by plating for viable counts (see Materials and  
965 Methods). No significant differences were observed, as determined by 2-way ANOVA.

966 **Fig S5. QseC and RpoS are not required for disease by *C. rodentium* ( $\Phi$ stx<sub>2dact</sub>).** Eight-  
967 week old female C57BL/6 mice were infected by oral gavage with the indicated lysogens. **A.**  
968 Percentage weight change was determined at indicated post-infection time. Data shown are  
969 averages  $\pm$  SEM of 10 mice per group. No significant differences were observed, as determined  
970 by 2-way ANOVA. **B.** Percent survival at the indicated post-infection time was monitored in 10  
971 mice per group. Data represent cumulative results of 3 separate experiments.

972



Figure 1. Prophage  $\Phi stx_{2dact}$  in *C. rodentium* ( $\Phi stx_{2dact}$ )

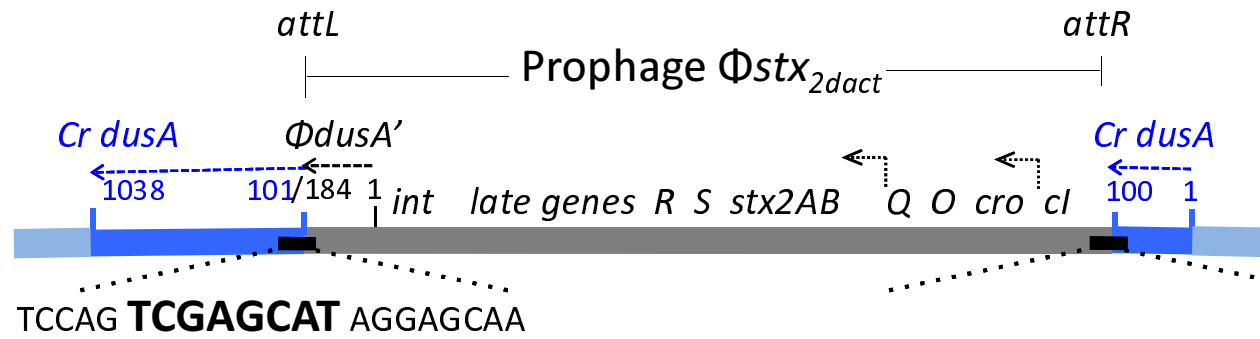

**Figure 2. SOS responsiveness and lytic induction-dependent transcription of *stx* genes are required for wild type basal and induced levels of Stx2 production *in vitro*.**

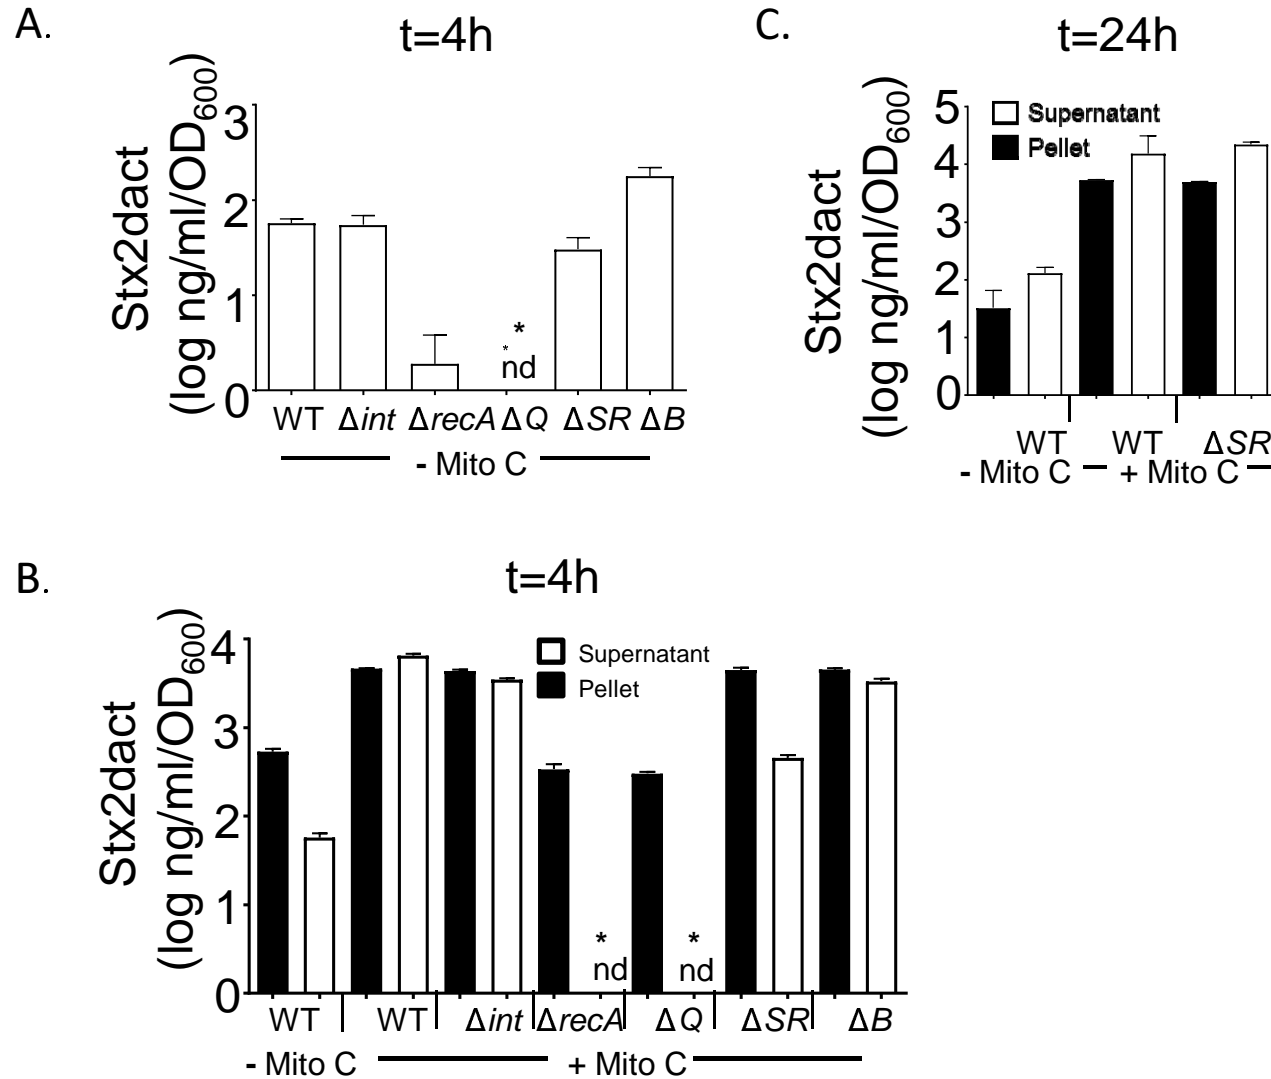

**Figure 3. *C. rodentium* ( $\Phi stx_{2dact}$ ) undergoes lytic induction during murine infection.**

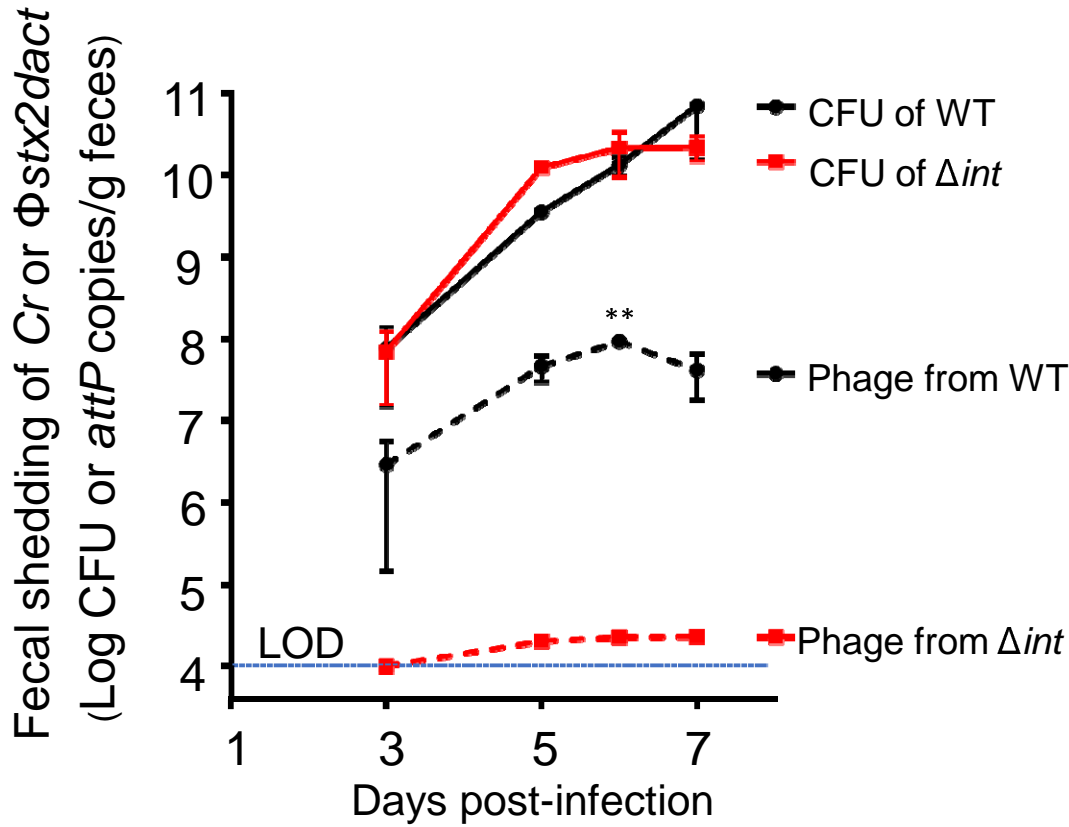

**Figure. 4. Lethal disease in mice correlates with the ability to produce Stx2dact but not with the ability to produce phage.**

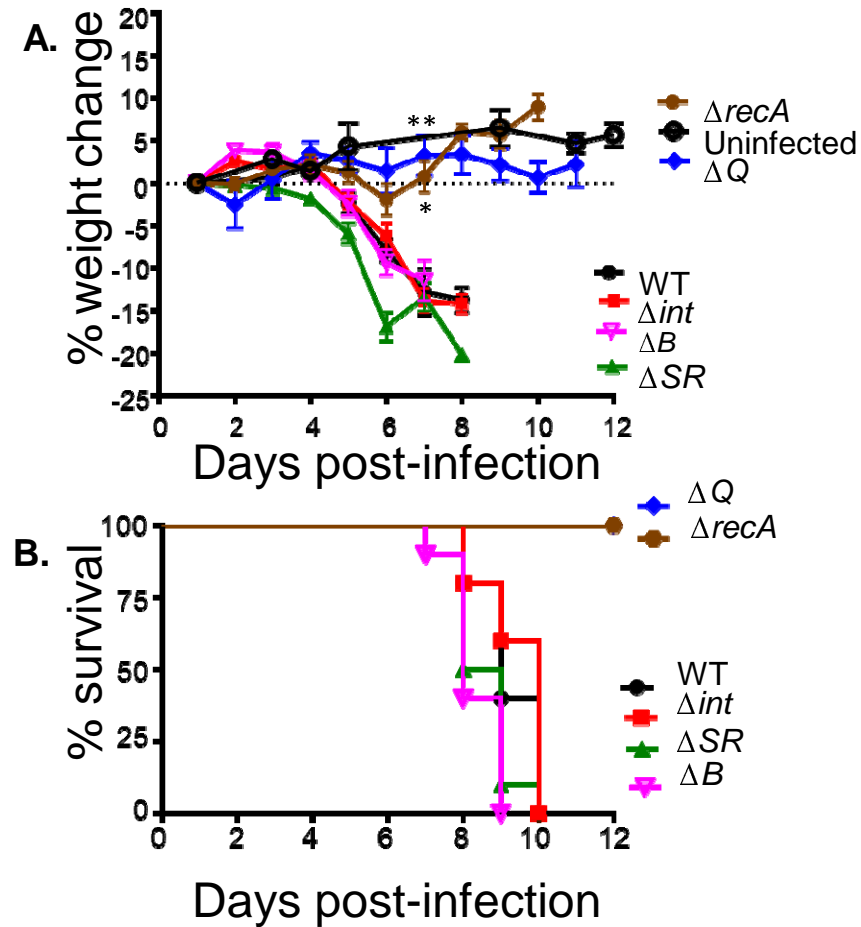

**Figure S1. Genetic structure and integration site of prophage  $\Phi$ stx<sub>2dact</sub> in *C. rodentium*.**

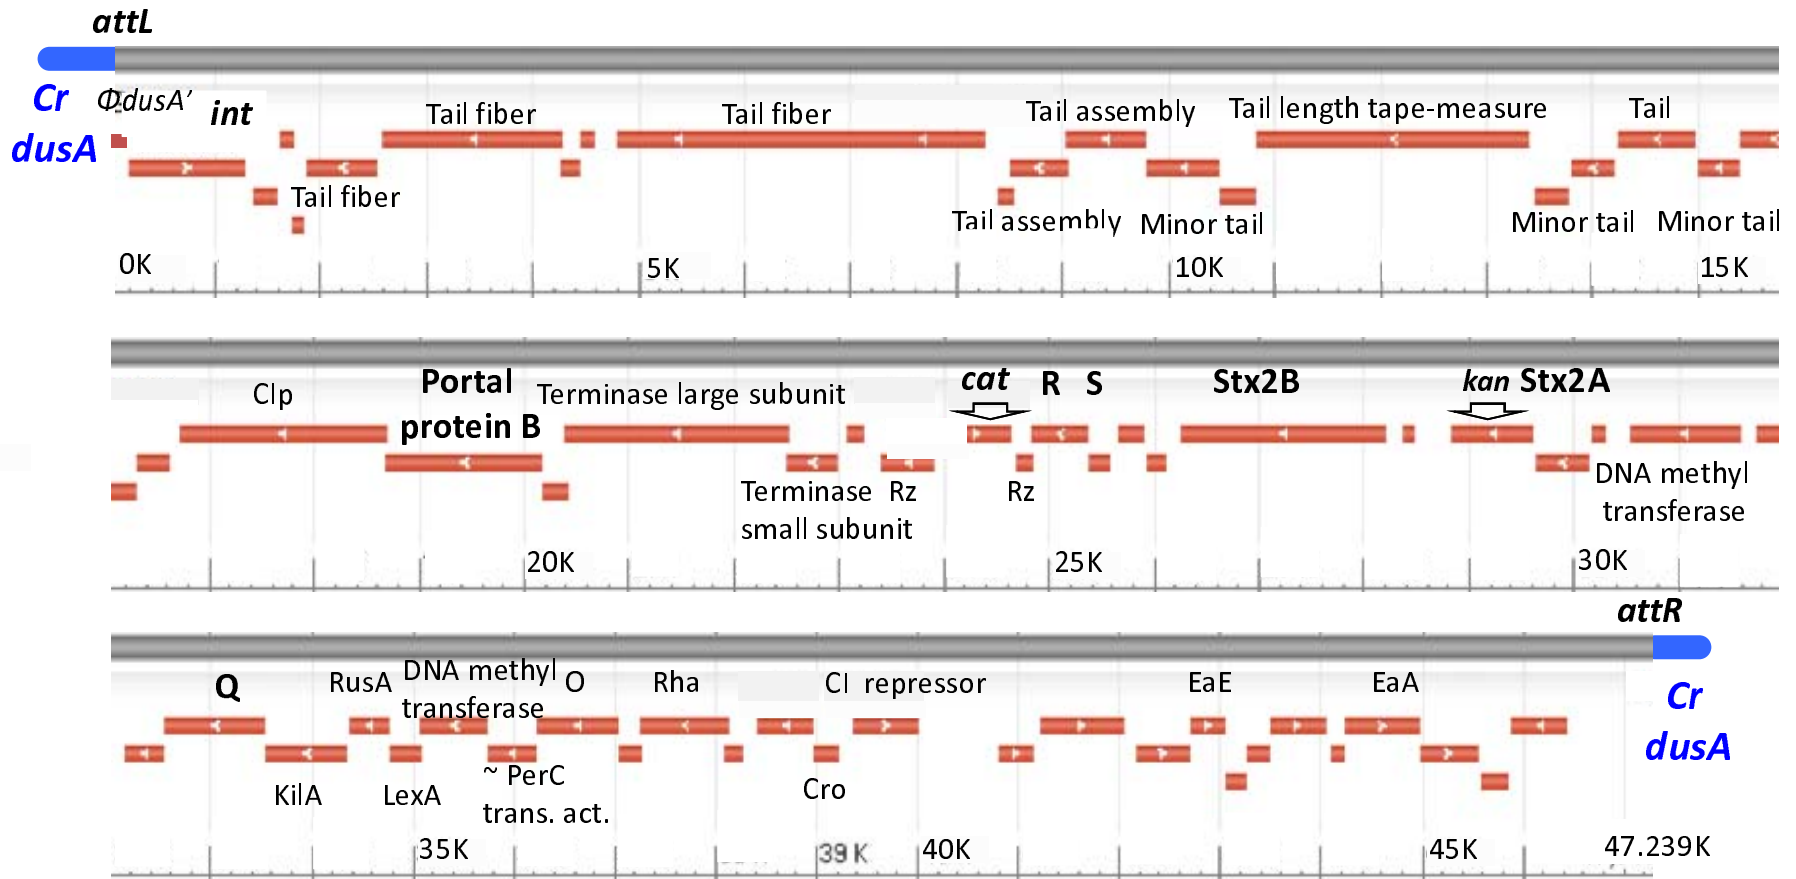

**Figure S2. *C. rodentium* ( $\Phi stx_{2dact}$ ) mutants display no *in vitro* growth defects.**

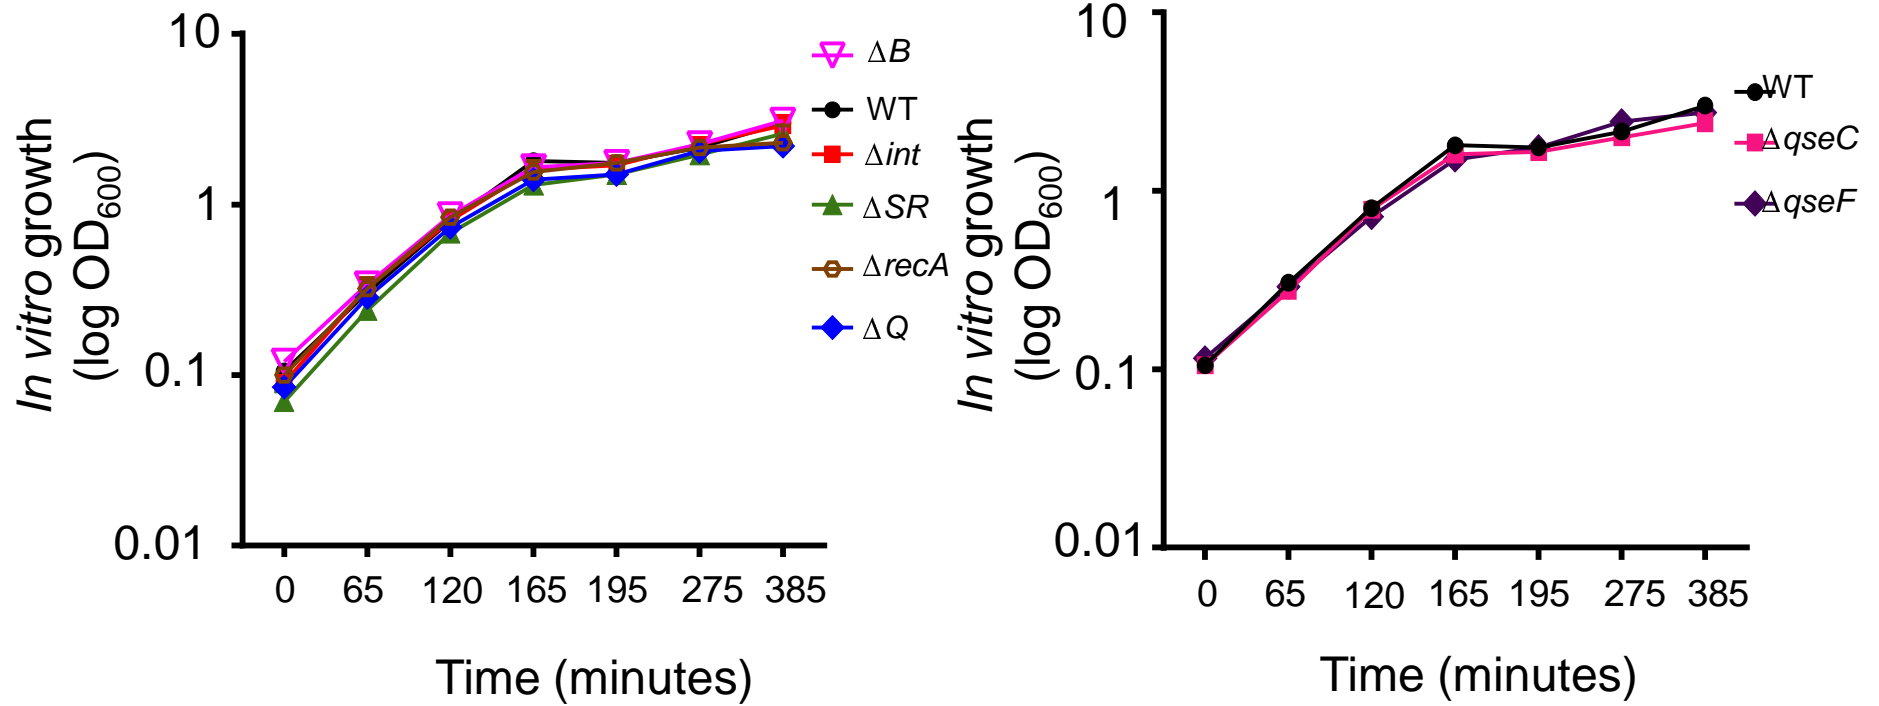

**Figure S3. QseC and RpoS are not required for Stx2 production *in vitro*.**

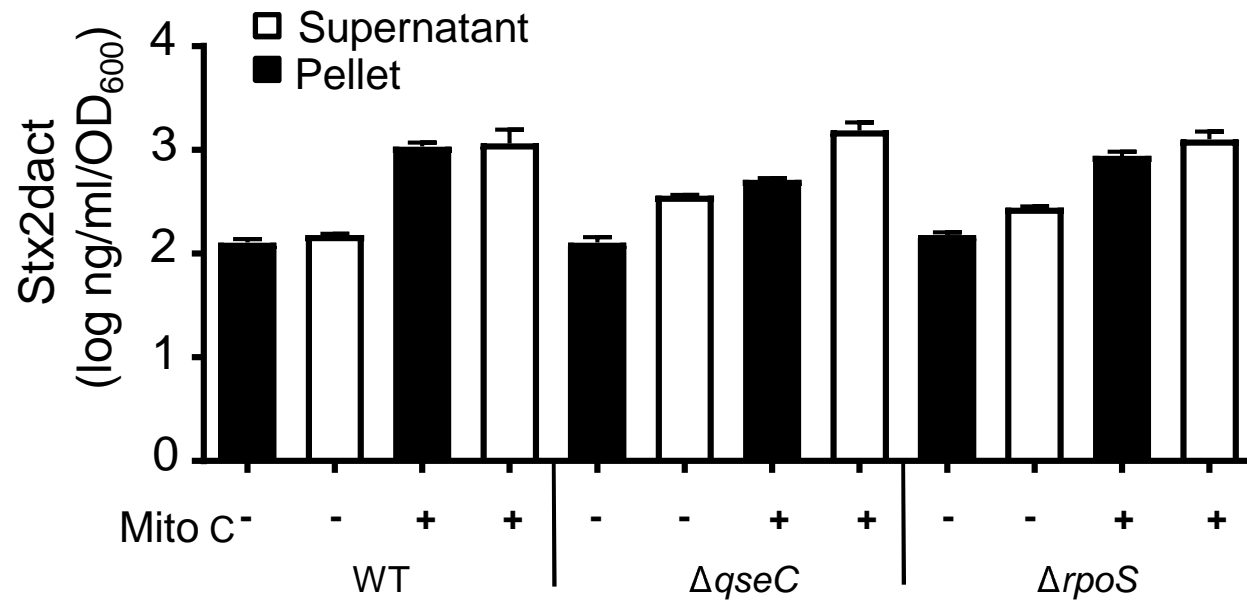

**Figure S4. *C. rodentium* ( $\Phi stx_{2dact}$ ) mutants display no colonization defects.**

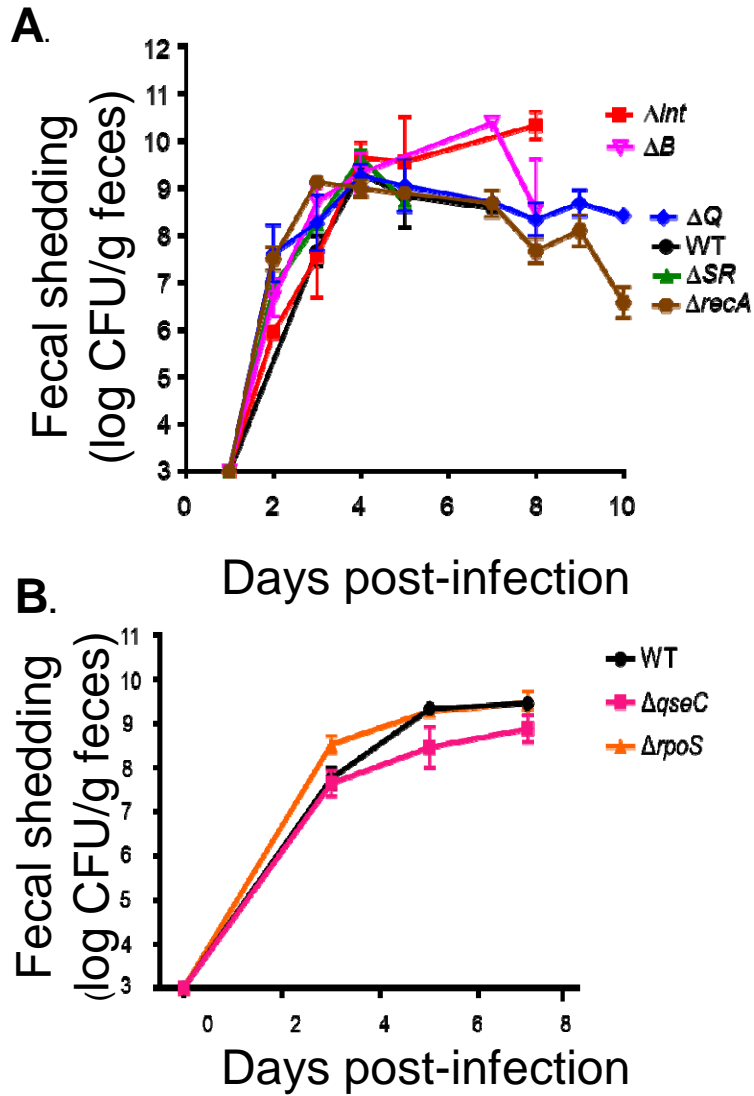



**Figure S5. QseC and RpoS are not required for disease by *C. rodentium* ( $\Phi stx_{2dact}$ ).**

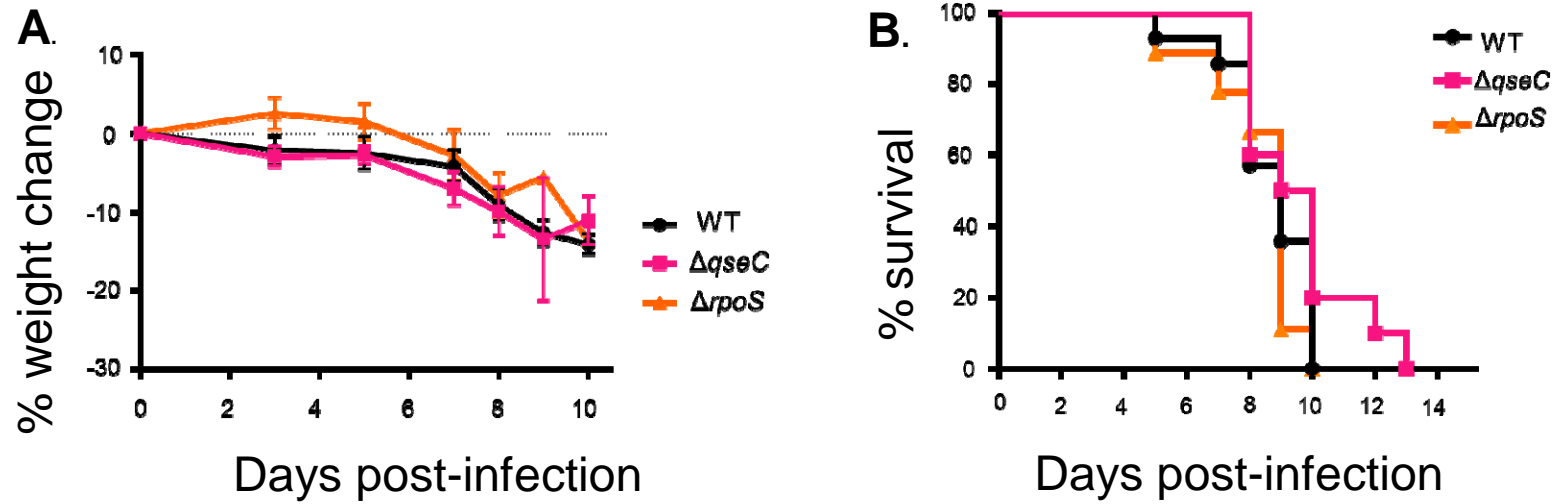

Source: http://biorxiv.org/content/10.1101/348706v1.full.pdf
